# Supplementary material for: Cyclic vs. acyclic alkyne towards Hg2+ ion detection: combined experimental and theoretical studies
Source: Royal Society of Chemistry journal article supplement (doi:10.1039/d1nj05707c), 2022-01-01
Supplement: d1nj05707c1.pdf [file d1nj05707c1.pdf]

## Electronic Supporting Information

# Cyclic vs Acyclic Alkyne towards Hg<sup>2+</sup> ion detection: A Combined Experimental and Theoretical Studies

Adwitiya Pal,<sup>a</sup> Bappaditya Goswami,<sup>b</sup> Arunabha Thakur<sup>\*a</sup>

<sup>a</sup>Department of Chemistry, Jadavpur University, Kolkata- 700032, India.

<sup>b</sup>Department of Chemical Sciences, Indian Institute of Science Education and Research  
Kolkata, Mohanpur-741246, India.

Phone : 0332-4572779, +919937760940.

Email: [arunabha.thakur@jadavpuruniversity.in](mailto:arunabha.thakur@jadavpuruniversity.in), [babuiitm07@gmail.com](mailto:babuiitm07@gmail.com)

| <b><u>Contents</u></b>                                                                                                                                                                         | <b><u>Page</u></b> |
|------------------------------------------------------------------------------------------------------------------------------------------------------------------------------------------------|--------------------|
| <b>Fig. S1:</b> <sup>1</sup> H NMR spectra of <b>3</b> in CDCl <sub>3</sub> .                                                                                                                  | 4                  |
| <b>Fig. S2:</b> <sup>13</sup> C NMR spectra of <b>3</b> in CDCl <sub>3</sub> .                                                                                                                 | 5                  |
| <b>Fig. S3:</b> HRMS of <b>3</b> .                                                                                                                                                             | 6                  |
| <b>Fig. S4:</b> IR spectrum of <b>3</b> .                                                                                                                                                      | 7                  |
| <b>Fig. S5:</b> <sup>1</sup> H NMR spectra of <b>4</b> in CDCl <sub>3</sub> .                                                                                                                  | 8                  |
| <b>Fig. S6:</b> <sup>13</sup> C NMR spectra of <b>4</b> in CDCl <sub>3</sub> .                                                                                                                 | 9                  |
| <b>Fig. S7:</b> HRMS of <b>4</b> .                                                                                                                                                             | 10                 |
| <b>Fig. S8:</b> IR spectrum of <b>4</b> .                                                                                                                                                      | 11                 |
| <b>Fig. S9:</b> UV-vis titrations of compounds (a) <b>3</b> and (b) <b>4</b> in presence of several metal ions (CH <sub>3</sub> CN, 3.12 × 10 <sup>-5</sup> M).                                | 12                 |
| <b>Fig. S10:</b> HRMS of [ <b>4</b> +Hg+ClO <sub>4</sub> ].                                                                                                                                    | 13                 |
| <b>Fig. S11:</b> UV-vis titrations of compounds <b>3</b> and <b>4</b> in presence of up to 1 equiv Cu <sup>2+</sup> and Fe <sup>3+</sup> ions (CH <sub>3</sub> CN, 3.12 × 10 <sup>-5</sup> M). | 14                 |
| <b>Fig. S12:</b> Reversible oxidation-reduction interactions obtained by UV-vis                                                                                                                |                    |

|                                                                                                                                                                                                                                                                                                                              |    |
|------------------------------------------------------------------------------------------------------------------------------------------------------------------------------------------------------------------------------------------------------------------------------------------------------------------------------|----|
| titrations of ferrocene centers of compounds <b>3</b> and <b>4</b> in presence of up to 1 equiv Cu <sup>2+</sup> /Fe <sup>3+</sup> ions and LAS alternatively.                                                                                                                                                               | 15 |
| <b>Fig. S13:</b> Fluorescence spectra of compounds <b>3</b> and <b>4</b> in presence of several metal ions.                                                                                                                                                                                                                  | 16 |
| <b>Fig. S14:</b> Linear plots for the determination of LOD for <b>3</b> and <b>4</b> from fluorescence experiments.                                                                                                                                                                                                          | 17 |
| <b>Fig. S15:</b> Binding constant of compound <b>4</b> by using Stern-Volmer equation fluorescence titration in presence of Hg <sup>2+</sup> ion.                                                                                                                                                                            | 18 |
| <b>Fig. S16:</b> Association constants from Bindfit models of <b>3</b> and <b>4</b> with Hg <sup>2+</sup> .                                                                                                                                                                                                                  | 19 |
| <b>Fig. S17:</b> Fluorescence titrations of compounds <b>3</b> and <b>4</b> in presence of up to 1 equiv Cu <sup>2+</sup> and Fe <sup>3+</sup> ions.                                                                                                                                                                         | 20 |
| <b>Fig. S18:</b> Reversibility of the interactions of compounds (a) <b>3</b> and (b) <b>4</b> (CH <sub>3</sub> CN, 2.5 × 10 <sup>-4</sup> M) with Hg <sup>2+</sup> (CH <sub>3</sub> CN, 2.5 × 10 <sup>-4</sup> M) tested by employing aqueous solution of Na <sub>2</sub> EDTA (H <sub>2</sub> O, 2.5 × 10 <sup>-4</sup> M). | 21 |
| <b>Fig. S19:</b> CV of compounds (a) <b>3</b> and (b) <b>4</b> in presence of all metal ions (CH <sub>3</sub> CN, 2.5 × 10 <sup>-4</sup> M).                                                                                                                                                                                 | 22 |
| <b>Fig. S20:</b> CV and DPV of compound <b>3</b> in presence of up to 1 equiv Cu <sup>2+</sup> and Fe <sup>3+</sup> ions (CH <sub>3</sub> CN, 2.5 × 10 <sup>-4</sup> M).                                                                                                                                                     | 23 |
| <b>Fig. S21:</b> CV and DPV of compound <b>4</b> in presence of up to 1 equiv Cu <sup>2+</sup> and Fe <sup>3+</sup> ions (CH <sub>3</sub> CN, 2.5 × 10 <sup>-4</sup> M).                                                                                                                                                     | 24 |
| <b>Fig. S22:</b> Competition experiment of compound <b>4</b> with (a), (b) Cu <sup>2+</sup> /Hg <sup>2+</sup> couple and (c), (d) Fe <sup>3+</sup> /Hg <sup>2+</sup> couple (1.25 × 10 <sup>-4</sup> M CH <sub>3</sub> CN) under scan rate 0.06 Vs <sup>-1</sup> .                                                           | 25 |
| <b>Fig. S23:</b> <sup>1</sup> H NMR of compound <b>4</b> before and after addition of 1 equiv of Hg <sup>2+</sup> ion in CD <sub>3</sub> CN.                                                                                                                                                                                 | 26 |
| <b>Fig. S24:</b> Colorimetric test of (a) compound <b>3</b> (10 <sup>-3</sup> M CH <sub>3</sub> CN) and (b) compound <b>4</b> in presence of several metal ions.                                                                                                                                                             | 27 |
| <b>Fig. S25:</b> Real sample analysis of tap water samples for the determination of Hg <sup>2+</sup> ion by probes <b>3</b> and <b>4</b> .                                                                                                                                                                                   | 28 |
| <b>Fig. S26:</b> Frontiers MOs of the free ligand <b>3</b> with energy at B3LYP/lanl2dz / CPCM (acetonitrile) level.                                                                                                                                                                                                         | 29 |
| <b>Fig. S27:</b> Frontiers MOs of the free ligand <b>4</b> with energy at                                                                                                                                                                                                                                                    |    |

|                                                                                                                                                                                                                           |    |
|---------------------------------------------------------------------------------------------------------------------------------------------------------------------------------------------------------------------------|----|
| B3LYP/lanl2dz / CPCM (acetonitrile) level.                                                                                                                                                                                | 30 |
| <b>Table S1.</b> The selected distances (Å) and Wiberg Bond Index (WBI) of ligand/receptor <b>3</b> and <b>4</b> calculated at B3LYP/lanl2dz/cpcm (acetonitrile) level.                                                   | 31 |
| <b>Table S2.</b> The selected distances (Å) and Wiberg Bond Index (WBI) of [ <b>3</b> ·2Hg <sup>2+</sup> ] and [ <b>4</b> ·Hg <sup>2+</sup> ] calculated at B3LYP/lanl2dz/cpcm (acetonitrile) level.                      | 32 |
| <b>Fig. S28:</b> Frontiers MOs of [ <b>3</b> ·2Hg <sup>2+</sup> ] with energy at B3LYP/lanl2dz / CPCM (acetonitrile) level.                                                                                               | 33 |
| <b>Fig. S29:</b> Frontiers MOs of [ <b>4</b> ·Hg <sup>2+</sup> ] with energy at B3LYP/lanl2dz / CPCM (acetonitrile) level (left side).                                                                                    | 34 |
| <b>Fig. S30:</b> Frontiers MOs of [ <b>4</b> ·Hg <sup>2+</sup> ] with energy at B3LYP/lanl2dz / CPCM (acetonitrile) level (right side).                                                                                   | 35 |
| <b>Fig. S31:</b> Calculated absorption spectrum of the ligand/receptor <b>3</b> .                                                                                                                                         | 36 |
| <b>Table S3.</b> Major excited state transitions of the ligand/receptor <b>3</b> with Osc. Strength and $\lambda_{ex}$ .                                                                                                  | 36 |
| <b>Fig. S32:</b> Calculated absorption spectrum of the ligand/receptor <b>4</b> .                                                                                                                                         | 37 |
| <b>Table S4.</b> Major excited state transitions of the ligand/receptor <b>4</b> with Osc. Strength and $\lambda_{ex}$ .                                                                                                  | 37 |
| <b>Fig. S33:</b> Calculated absorption spectrum of the complex [ <b>3</b> ·2Hg <sup>2+</sup> ].                                                                                                                           | 38 |
| <b>Table S5.</b> Major excited state transitions of [ <b>3</b> ·2Hg <sup>2+</sup> ] (involving only terminal alkynes and nearby –O–CH <sub>2</sub> – atom as a binding unit) with Osc. Strength and $\lambda_{ex}$ .      | 38 |
| <b>Fig. S34:</b> Calculated absorption spectrum of the complex [ <b>4</b> ·Hg <sup>2+</sup> ].                                                                                                                            | 39 |
| <b>Table S6.</b> Major excited state transitions of [ <b>4</b> ·Hg <sup>2+</sup> ] (involving only conjugated alkynes as a binding unit) with Osc. Strength and $\lambda_{ex}$ .                                          | 39 |
| <b>Fig. S35:</b> Energy diagram of the frontier molecular orbitals of probe <b>3</b> and [ <b>3</b> ·2Hg <sup>2+</sup> ] and that of probe <b>4</b> and [ <b>4</b> ·Hg <sup>2+</sup> ] as obtained from DFT calculations. | 40 |
| <b>Table S7.</b> DFT Optimized coordinates of all the compounds.                                                                                                                                                          | 41 |

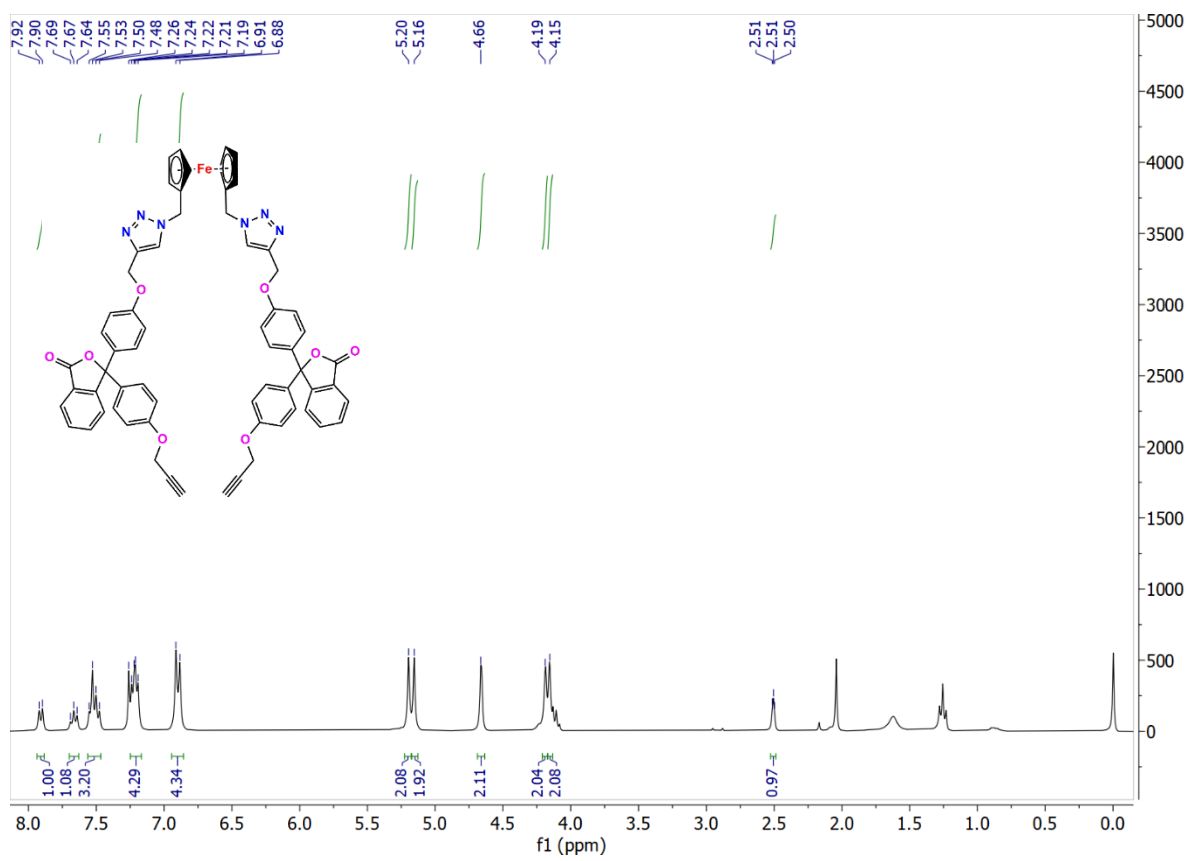

**Fig. S1:**  $^1\text{H}$  NMR spectra of **3** in  $\text{CDCl}_3$ .

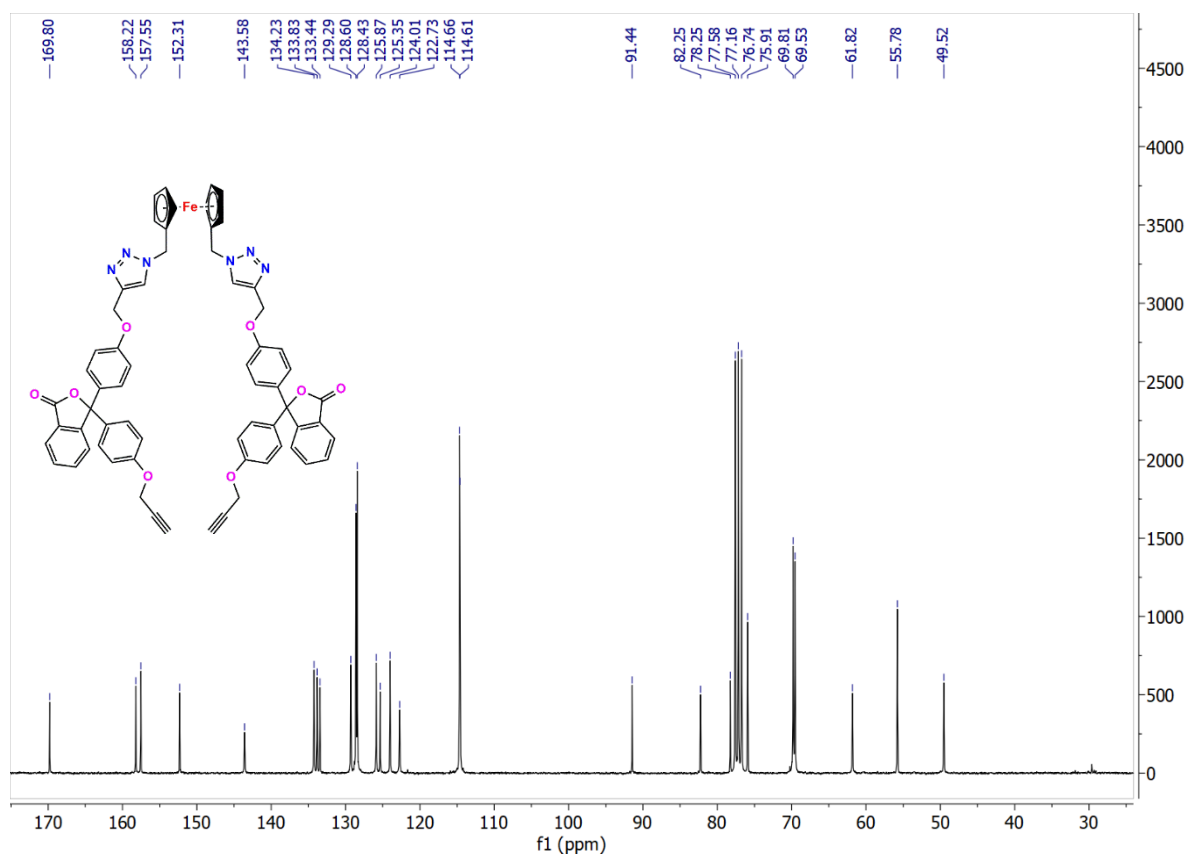

**Fig. S2:**  $^{13}\text{C}$  NMR spectra of **3** in  $\text{CDCl}_3$ .

**Single Mass Analysis**

Tolerance = 5.0 mDa / DBE: min = -1.5, max = 50.0

Element prediction: Off

Number of isotope peaks used for i-FIT = 3

Monoisotopic Mass, Even Electron Ions

5123 formula(e) evaluated with 1 results within limits (up to 50 best isotopic matches for each mass)

Elements Used:

| Mass      | Calc. Mass | mDa  | PPM  | DBE  | Formula          | i-FIT | i-FIT Norm | Fit Conf % | C  | H  | N | O | Fe |
|-----------|------------|------|------|------|------------------|-------|------------|------------|----|----|---|---|----|
| 1085.2932 | 1085.2961  | -2.9 | -2.7 | 43.5 | C64 H49 N6 O8 Fe | 237.0 | n/a        | n/a        | 64 | 49 | 6 | 8 | 1  |

DB\_SL  
07072022\_SU-7-TER 99 (0.890);AM2 (Ar:22000.0:556.28:0.00:LS 10); ABS

1. TOF MS ES+  
5.75e+005

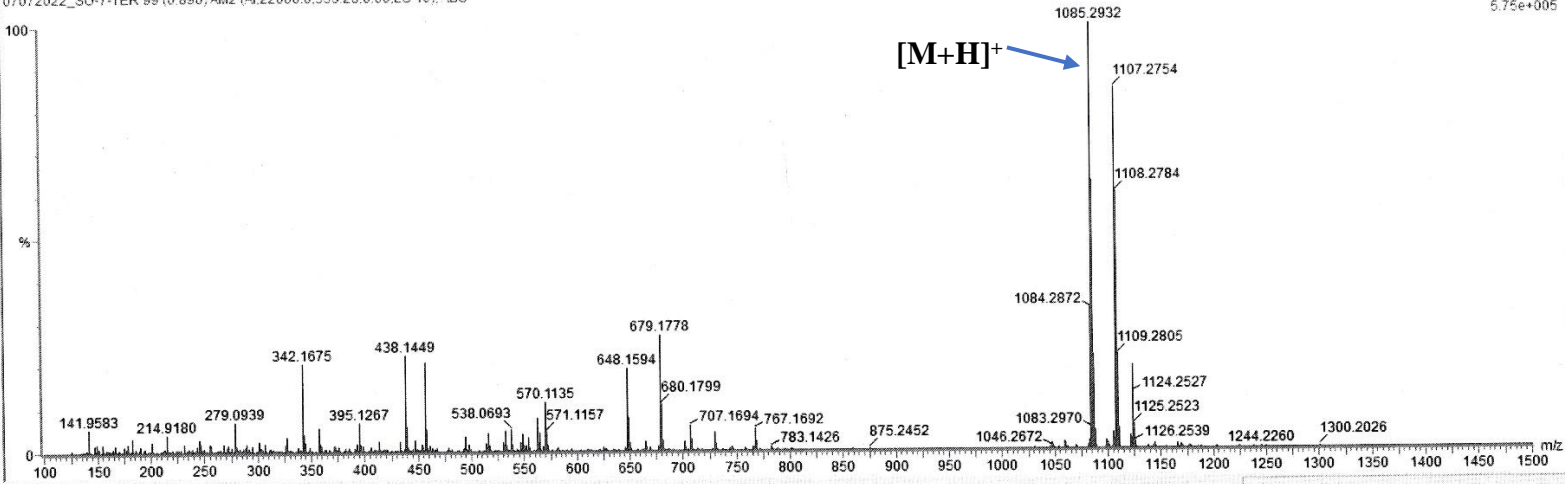

**Fig. S3: HRMS of 3.**

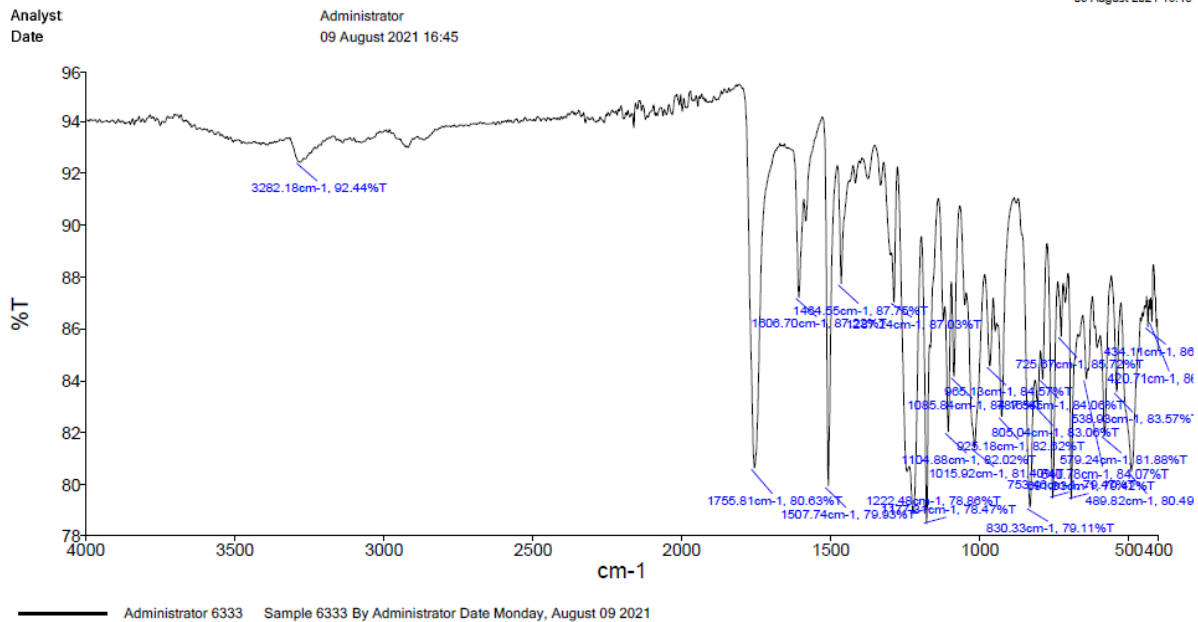

Fig. S4: IR spectrum of 3.

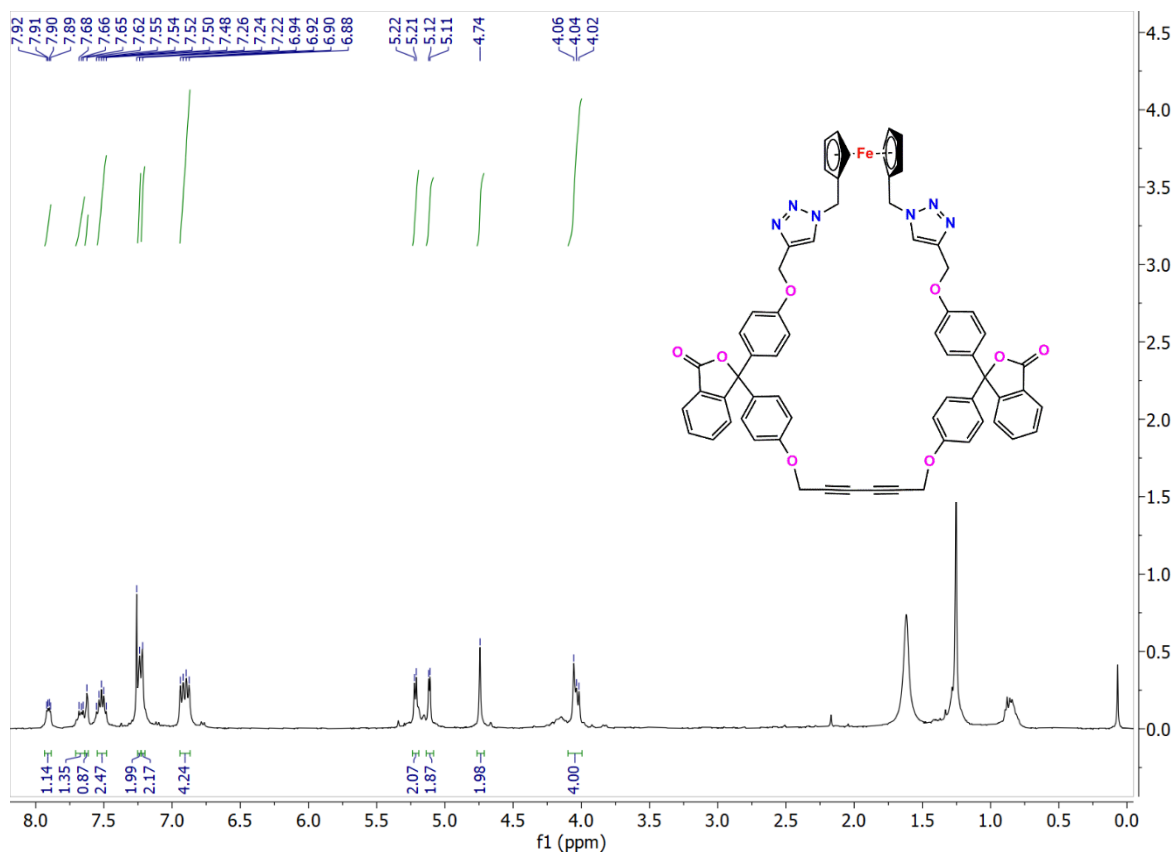

**Fig. S5:**  $^1\text{H NMR}$  spectra of **4** in  $\text{CDCl}_3$ .



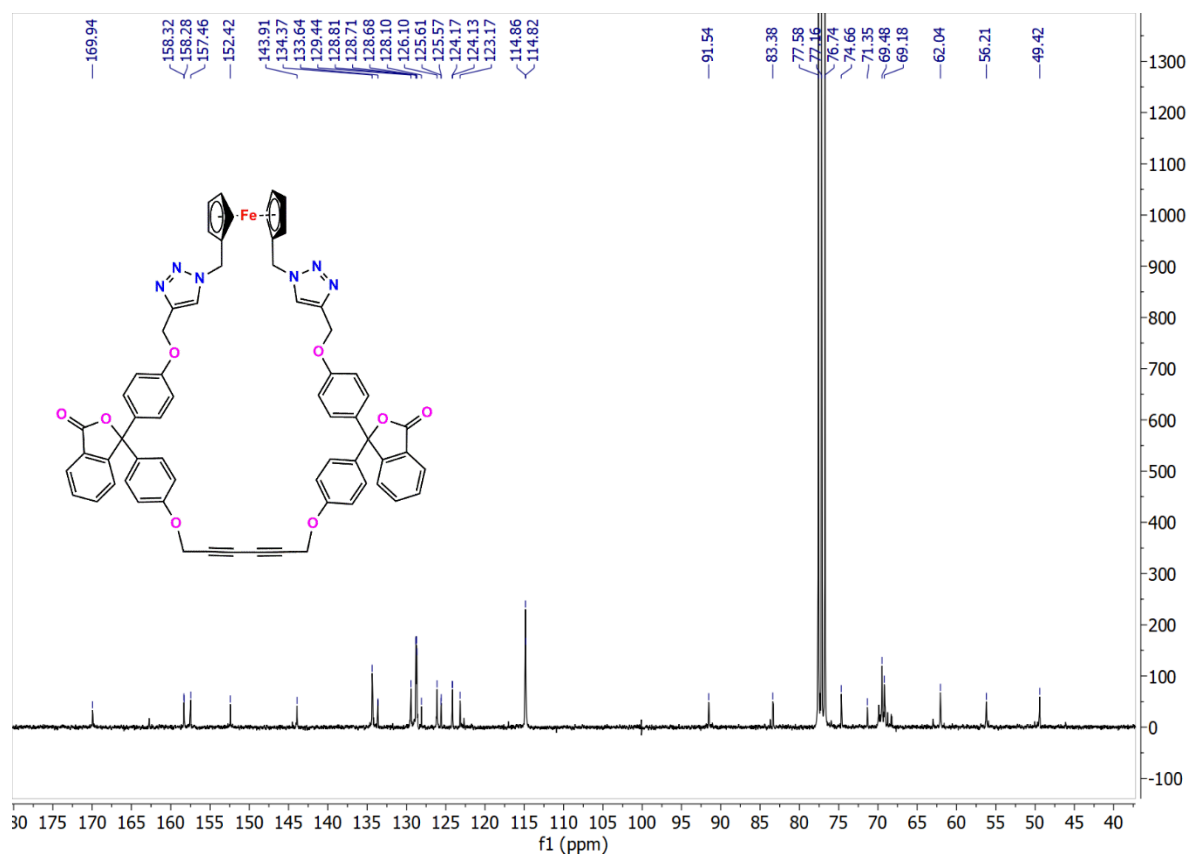

**Fig. S6:**  $^{13}\text{C}$  NMR spectra of **4** in  $\text{CDCl}_3$ .

**Single Mass Analysis**

Tolerance = 5.0 mDa / DBE: min = -1.5, max = 50.0

Element prediction: Off

Number of isotope peaks used for i-FIT = 3

Monoisotopic Mass, Even Electron Ions

5105 formula(e) evaluated with 1 results within limits (up to 50 best isotopic matches for each mass)

Elements Used:

| Mass      | Calc. Mass | mDa  | PPM  | DBE  | Formula                                                          | i-FIT | i-FIT Norm | Fit Conf % | C  | H  | N | O | Fe |
|-----------|------------|------|------|------|------------------------------------------------------------------|-------|------------|------------|----|----|---|---|----|
| 1083.2775 | 1083.2805  | -3.0 | -2.8 | 44.5 | C <sub>64</sub> H <sub>47</sub> N <sub>6</sub> O <sub>8</sub> Fe | 210.9 | n/a        | n/a        | 64 | 47 | 6 | 8 | 1  |

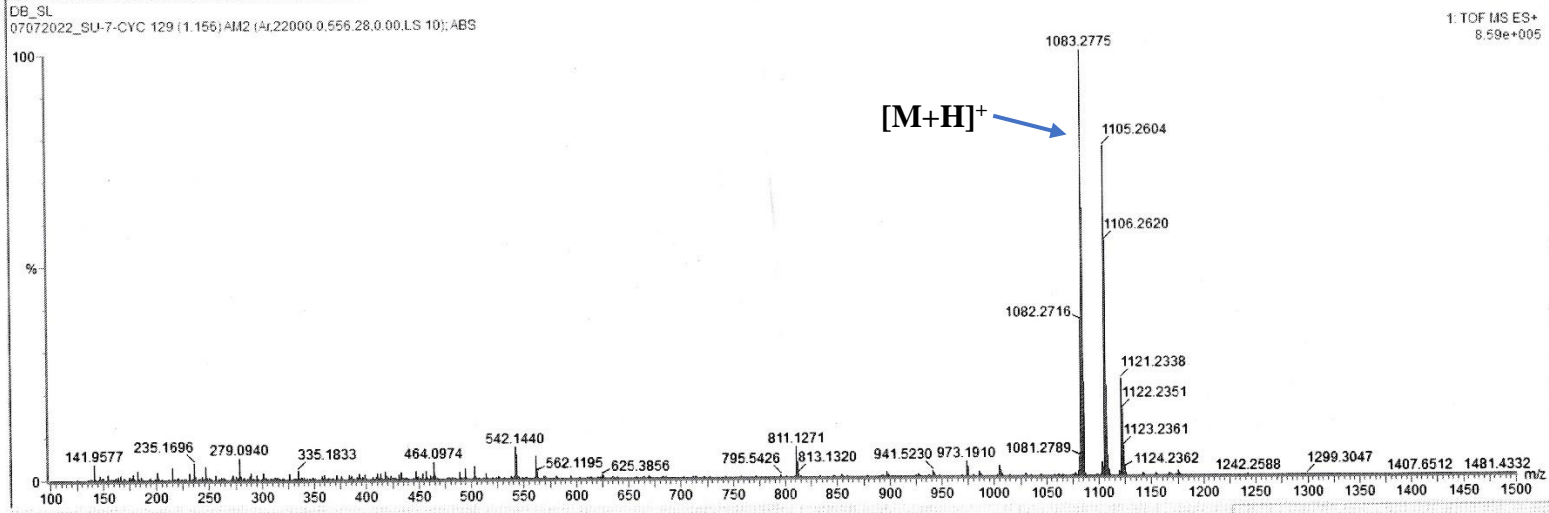**Fig. S7:** HRMS of 4.

Analyst  
Date

Administrator  
09 August 2021 16:52

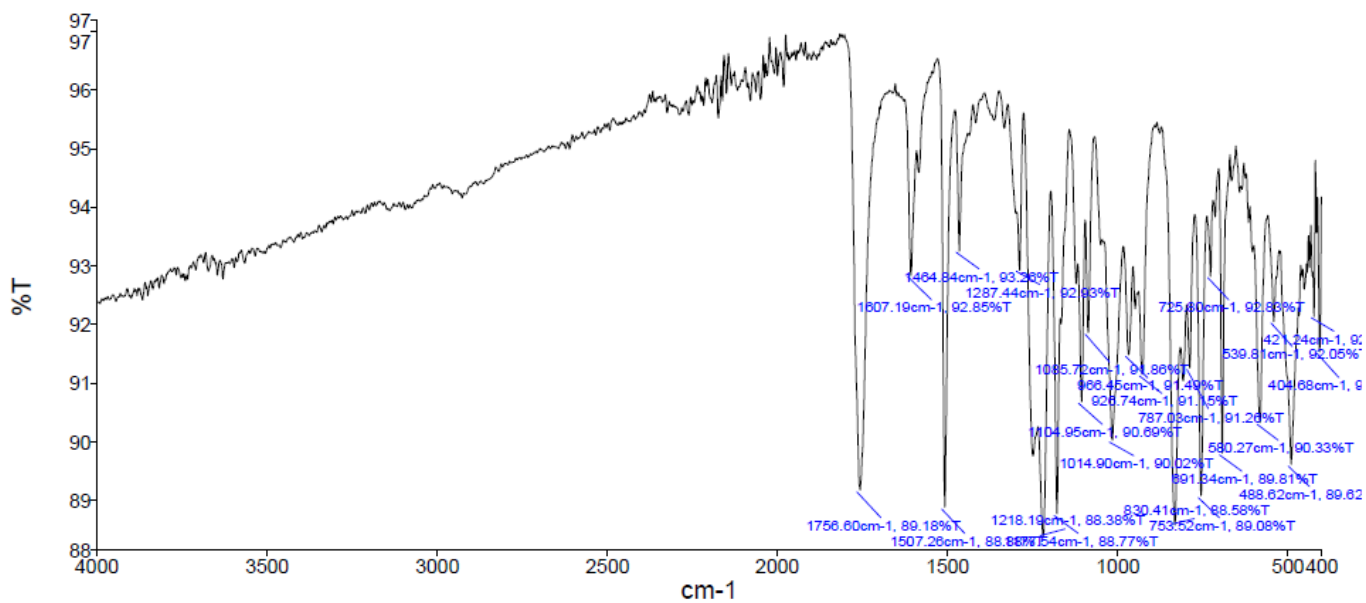

Administrator 6335 Sample 6335 By Administrator Date Monday, August 09 2021

Fig. S8: IR spectrum of 4.

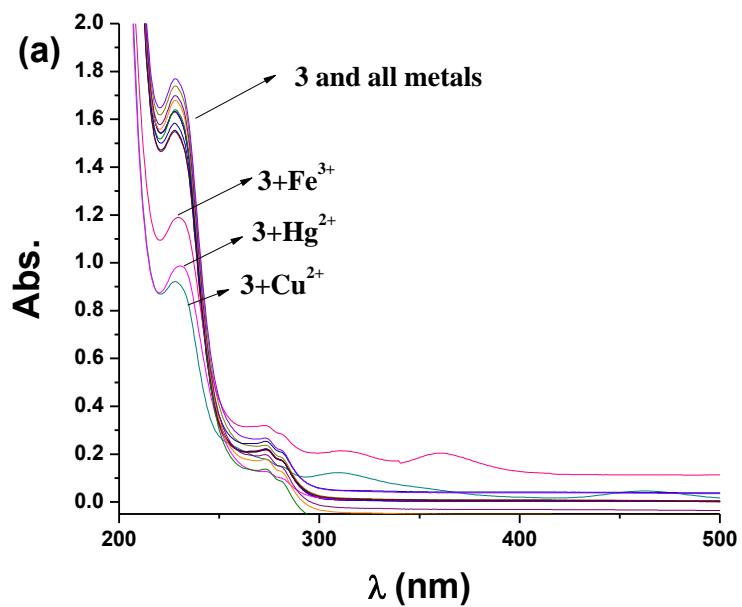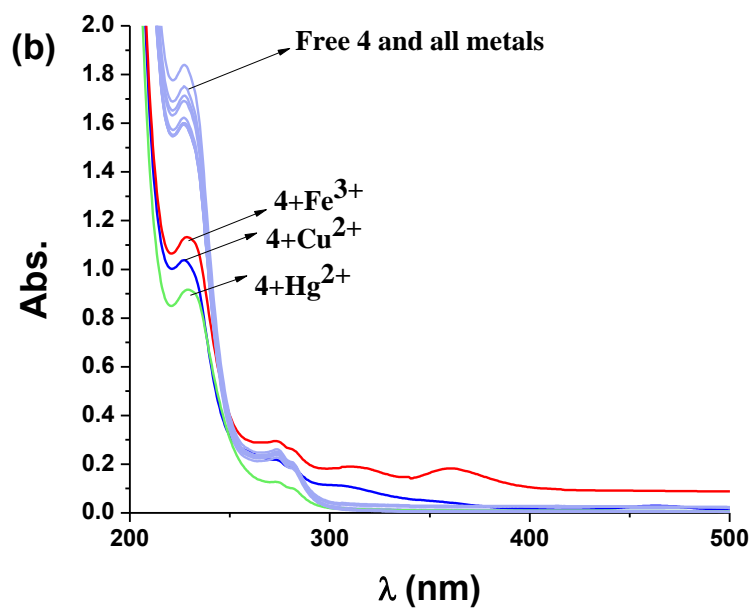

**Fig. S9:** UV-vis titrations of compounds (a) **3** and (b) **4** in presence of several metal ions ( $\text{CH}_3\text{CN}$ ,  $3.12 \times 10^{-5}$  M).

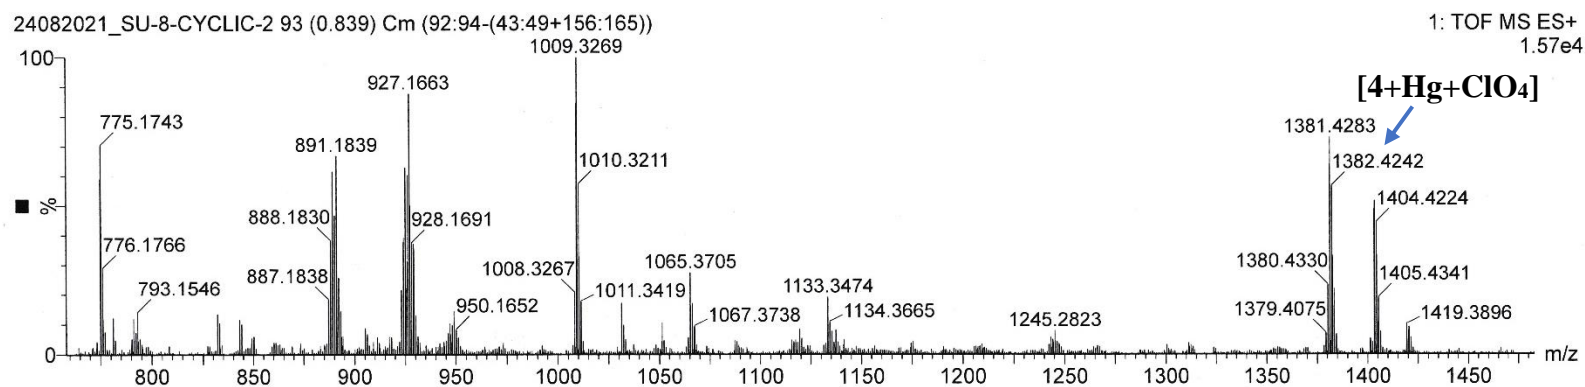

**Fig. S10:** HRMS of [4+Hg+ClO<sub>4</sub>].

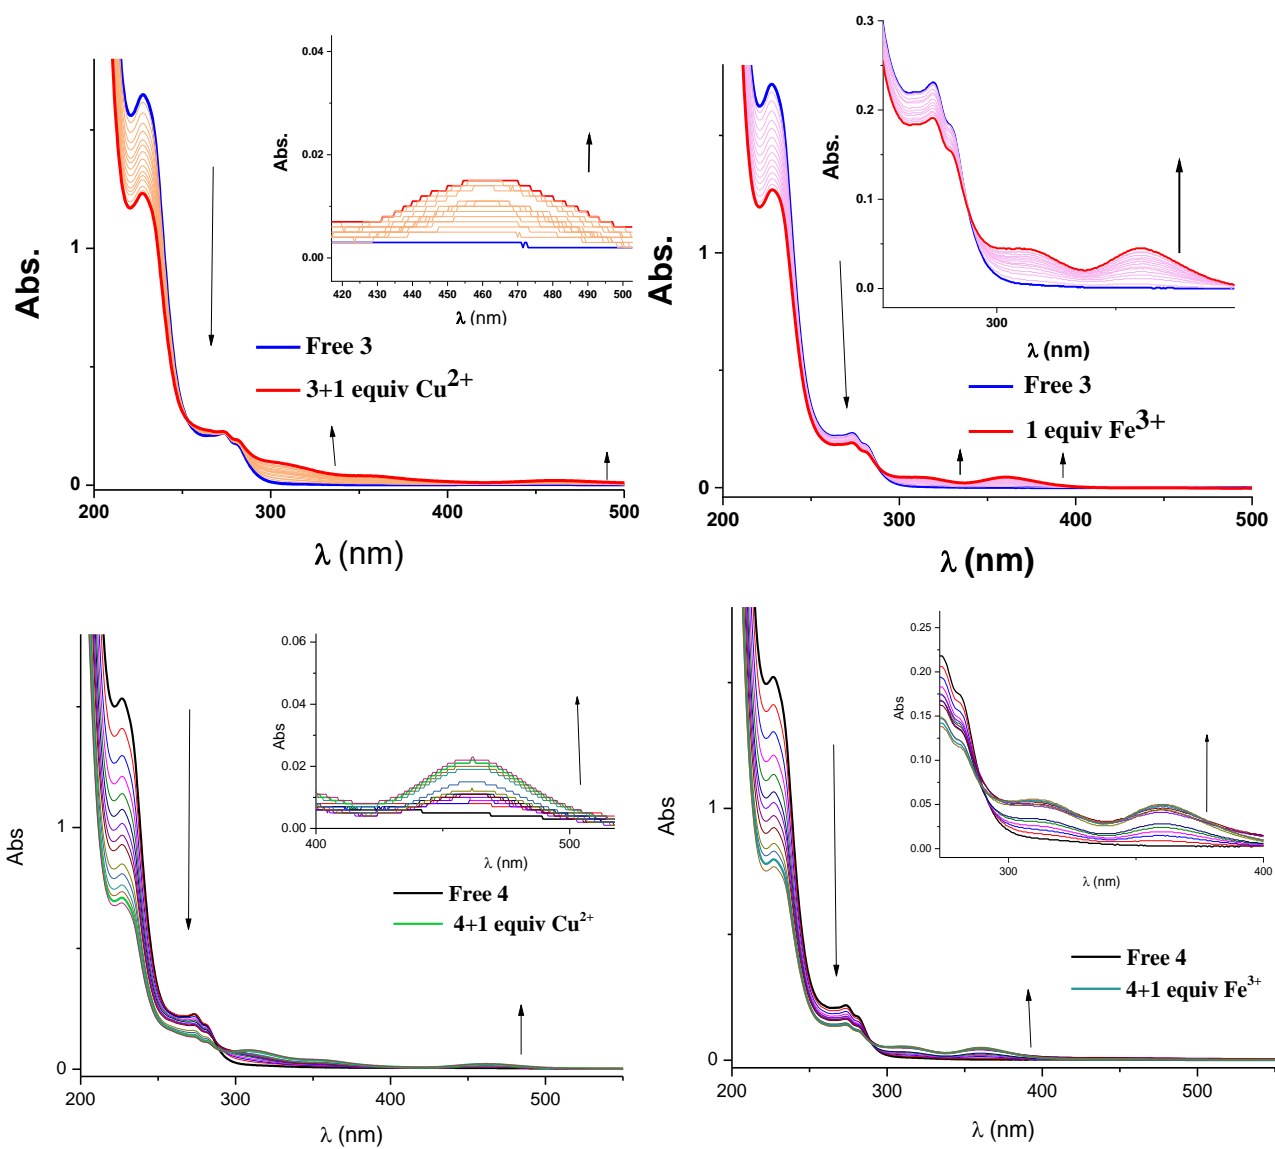

**Fig. S11:** UV-vis titrations of compounds **3** ( $\text{CH}_3\text{CN}$ ,  $3.12 \times 10^{-5}$  M) and **4** ( $\text{CH}_3\text{CN}$ ,  $3.12 \times 10^{-5}$  M) in presence of up to 1 equiv  $\text{Cu}^{2+}$  and  $\text{Fe}^{3+}$  ions ( $\text{CH}_3\text{CN}$ ,  $3.12 \times 10^{-5}$  M).

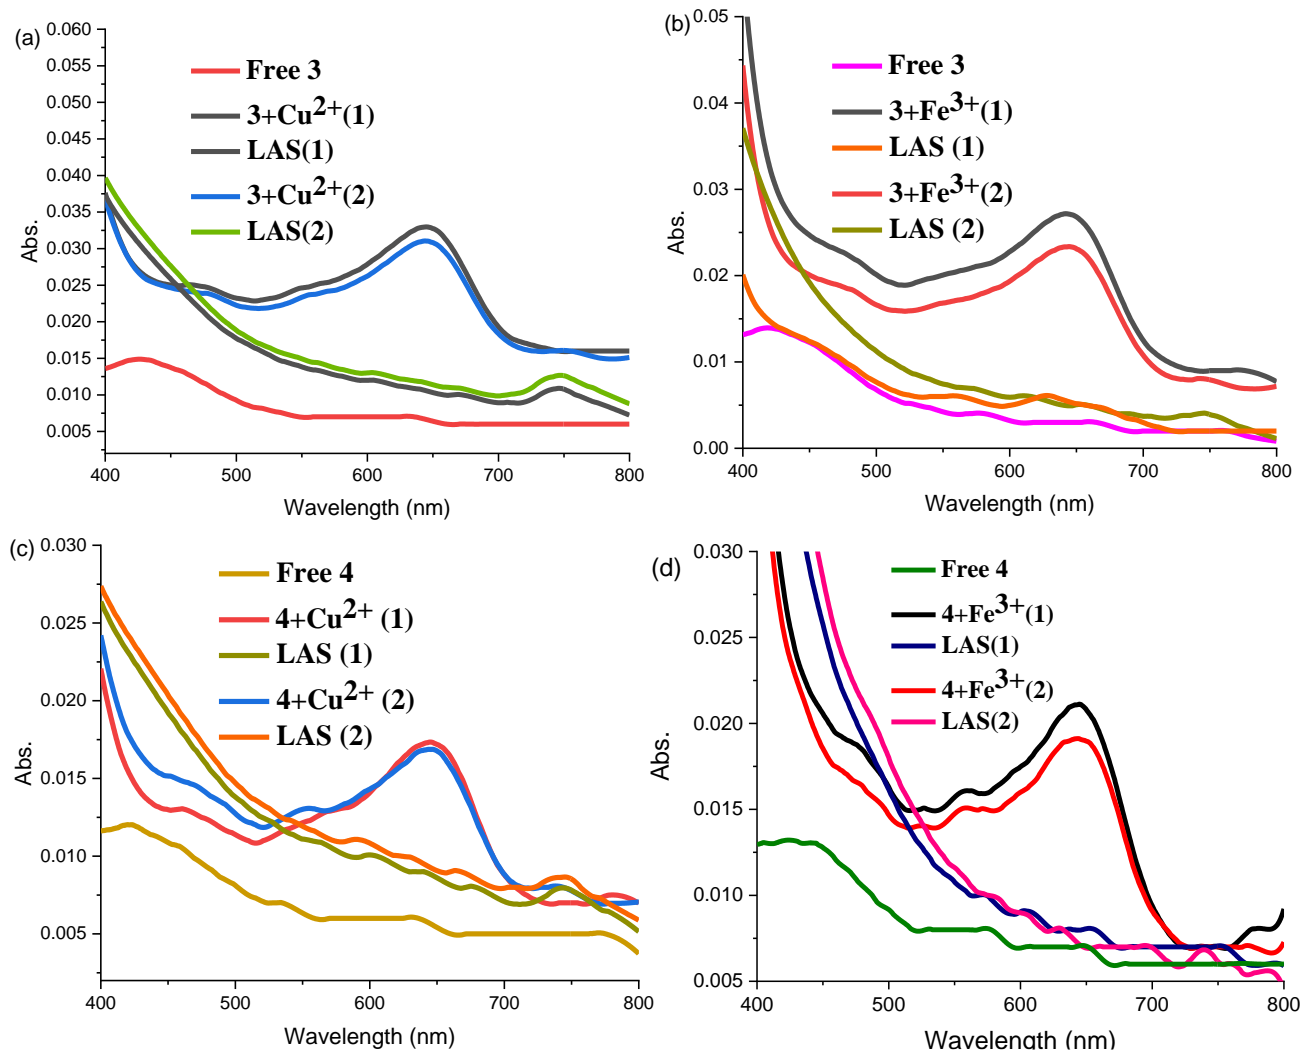

**Fig. S12:** Reversible oxidation-reduction interaction studies using UV-vis spectroscopic analysis of ferrocene centers of compounds **3** (CH<sub>3</sub>CN, 3.12 × 10<sup>-5</sup> M) and **4** (CH<sub>3</sub>CN, 3.12 × 10<sup>-5</sup> M) in presence of up to 1 equiv Cu<sup>2+</sup>/Fe<sup>3+</sup> ions (CH<sub>3</sub>CN, 1 × 10<sup>-3</sup> M) (oxidant) and Sodium-L-ascorbate (LAS) (H<sub>2</sub>O, 1 × 10<sup>-3</sup> M) (reductant) alternatively.

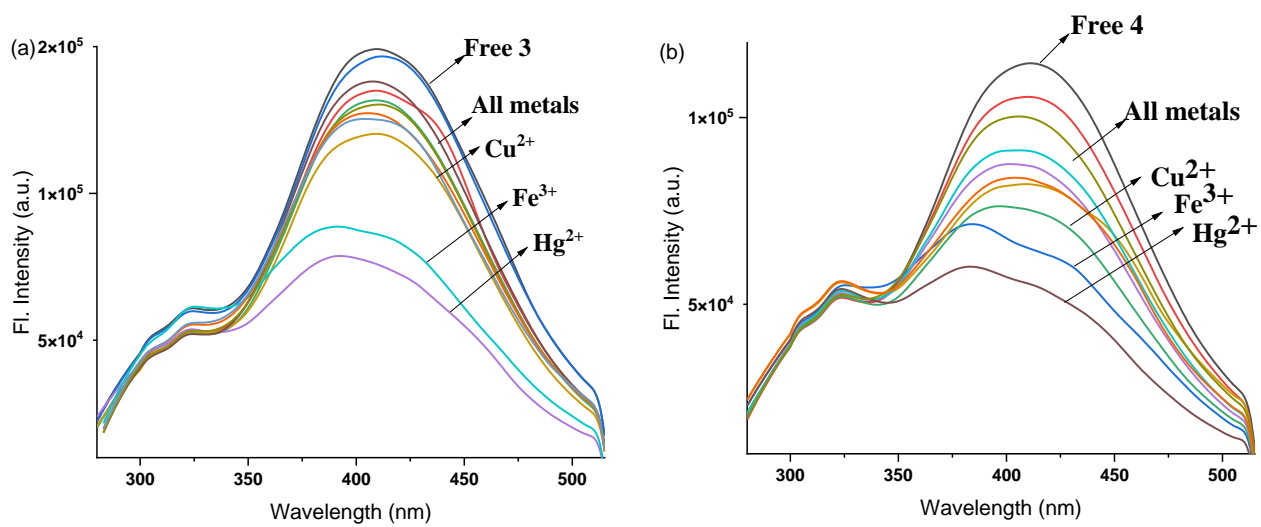

**Fig. S13:** Fluorescence spectra of compounds (a) **3** (CH<sub>3</sub>CN, 9.7 × 10<sup>-7</sup> M) and (b) **4** (CH<sub>3</sub>CN, 9.7 × 10<sup>-7</sup> M) in presence of several metal ions (CH<sub>3</sub>CN, 9.7 × 10<sup>-7</sup> M).



(a)

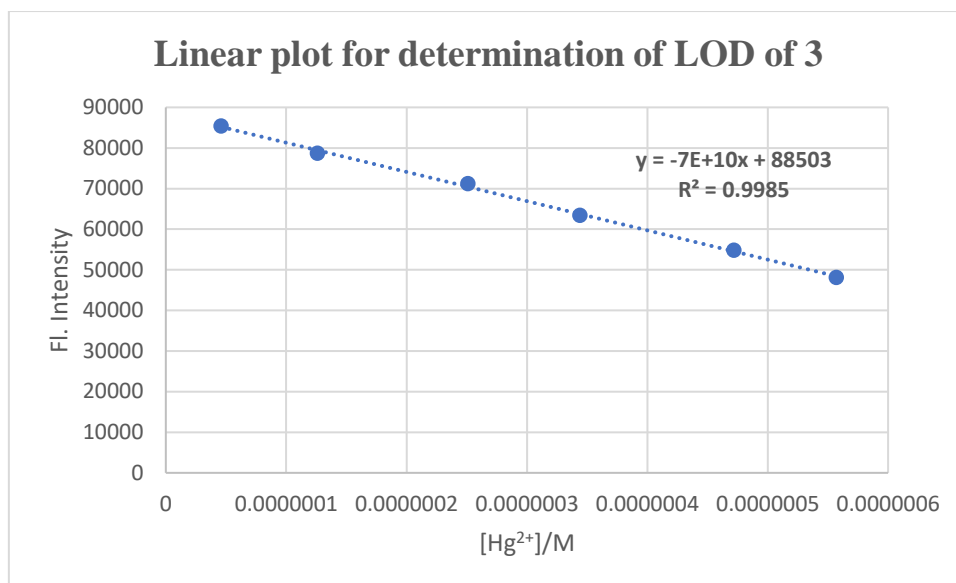

(b)

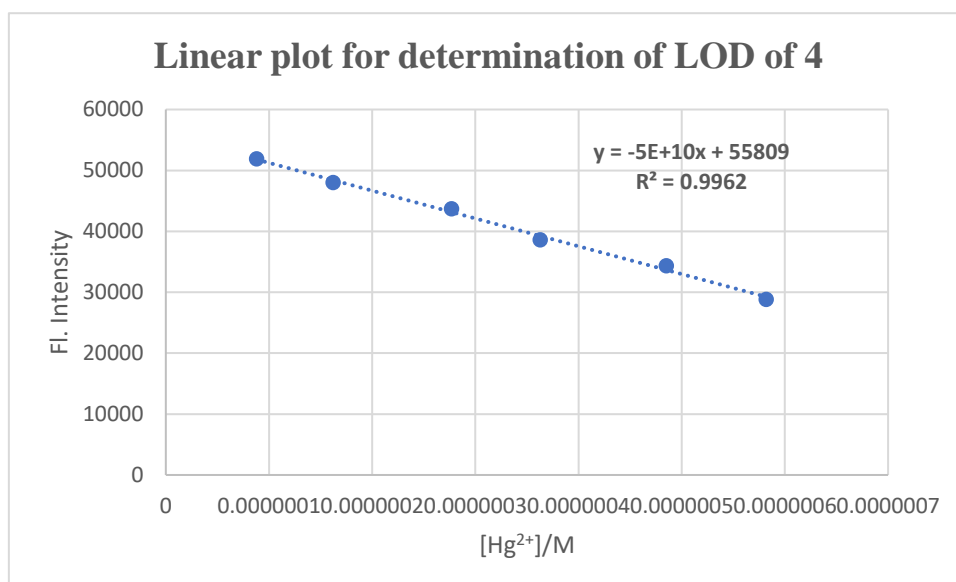

**Fig. S14:** Linear plots for the determination of LOD for (a) **3** and (b) **4** from fluorescence experiments.

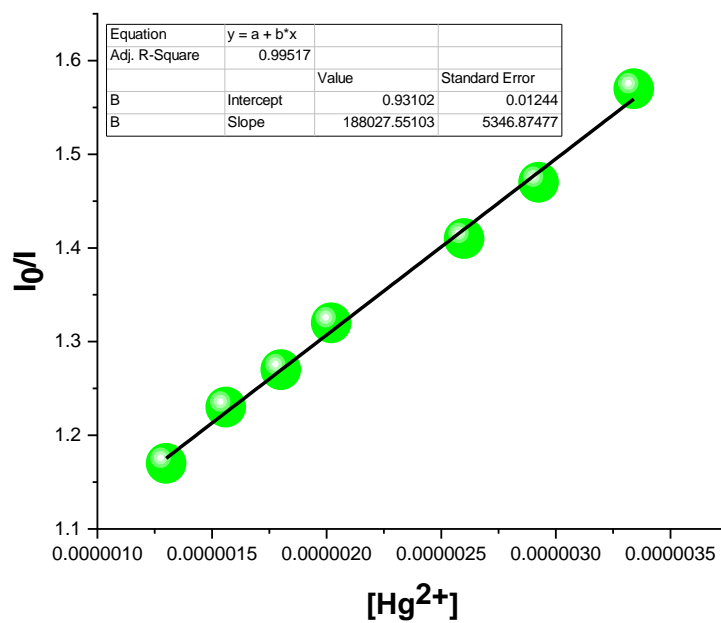

**Fig. S15:** Binding constant of compound **4** by using Stern-Volmer equation from fluorescence titration in presence of  $Hg^{2+}$ .

(a)

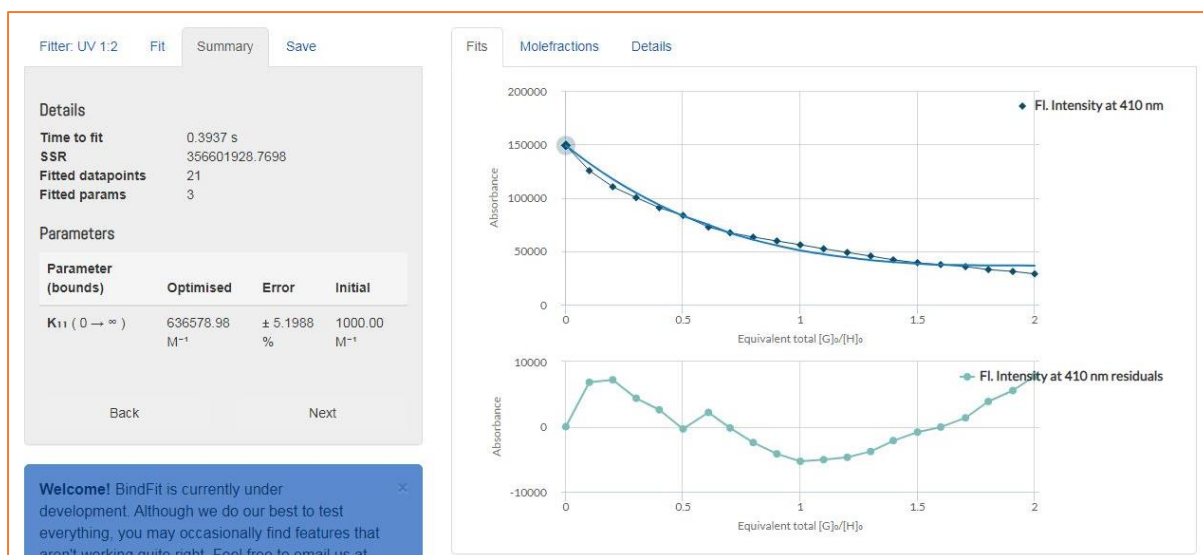

(b)

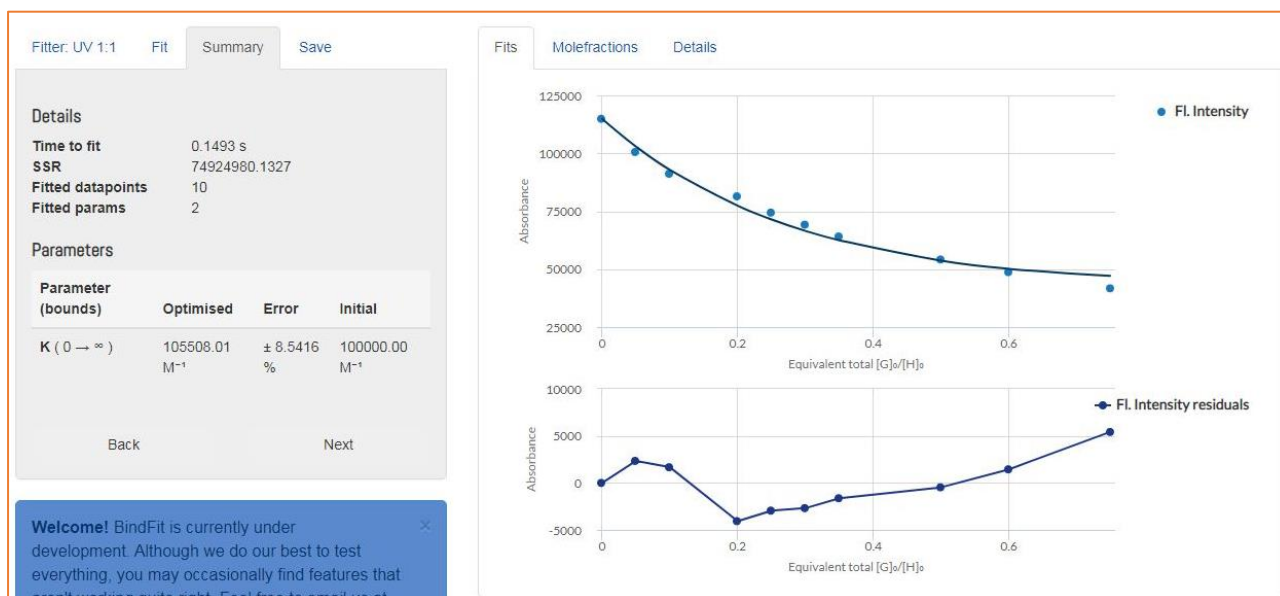

**Fig. S16:** Bindfit plots for Hg<sup>2+</sup>-binding by (a) **3** in 1:2 (non-cooperative) stoichiometry and (b) **4** in 1:1 stoichiometry from fluorescence titration using L-BFGS-B fit. Screenshots taken from the website [supramolecular.org](http://supramolecular.org).

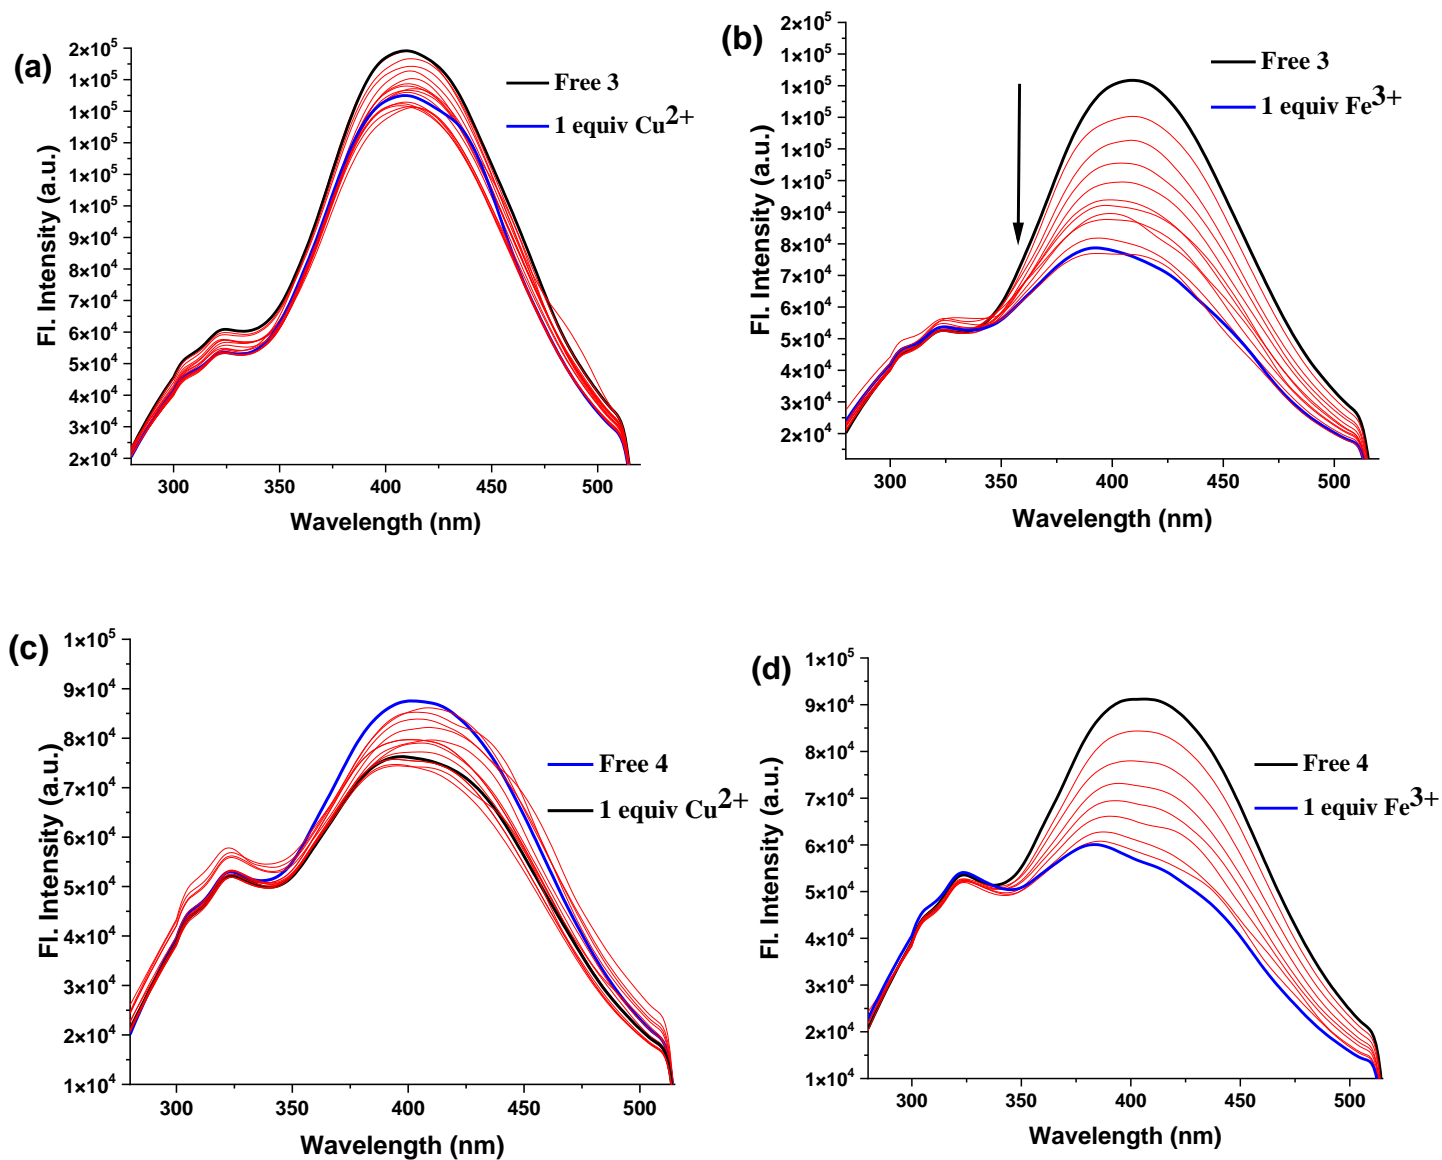

**Fig. S17:** Fluorescence titrations of compounds (a), (b) **3** ( $\text{CH}_3\text{CN}$ ,  $9.7 \times 10^{-7}$  M) and (c), (d) **4** ( $\text{CH}_3\text{CN}$ ,  $9.7 \times 10^{-7}$  M) in presence of up to 1 equiv  $\text{Cu}^{2+}$  and  $\text{Fe}^{3+}$  ions ( $\text{CH}_3\text{CN}$ ,  $9.7 \times 10^{-7}$  M).

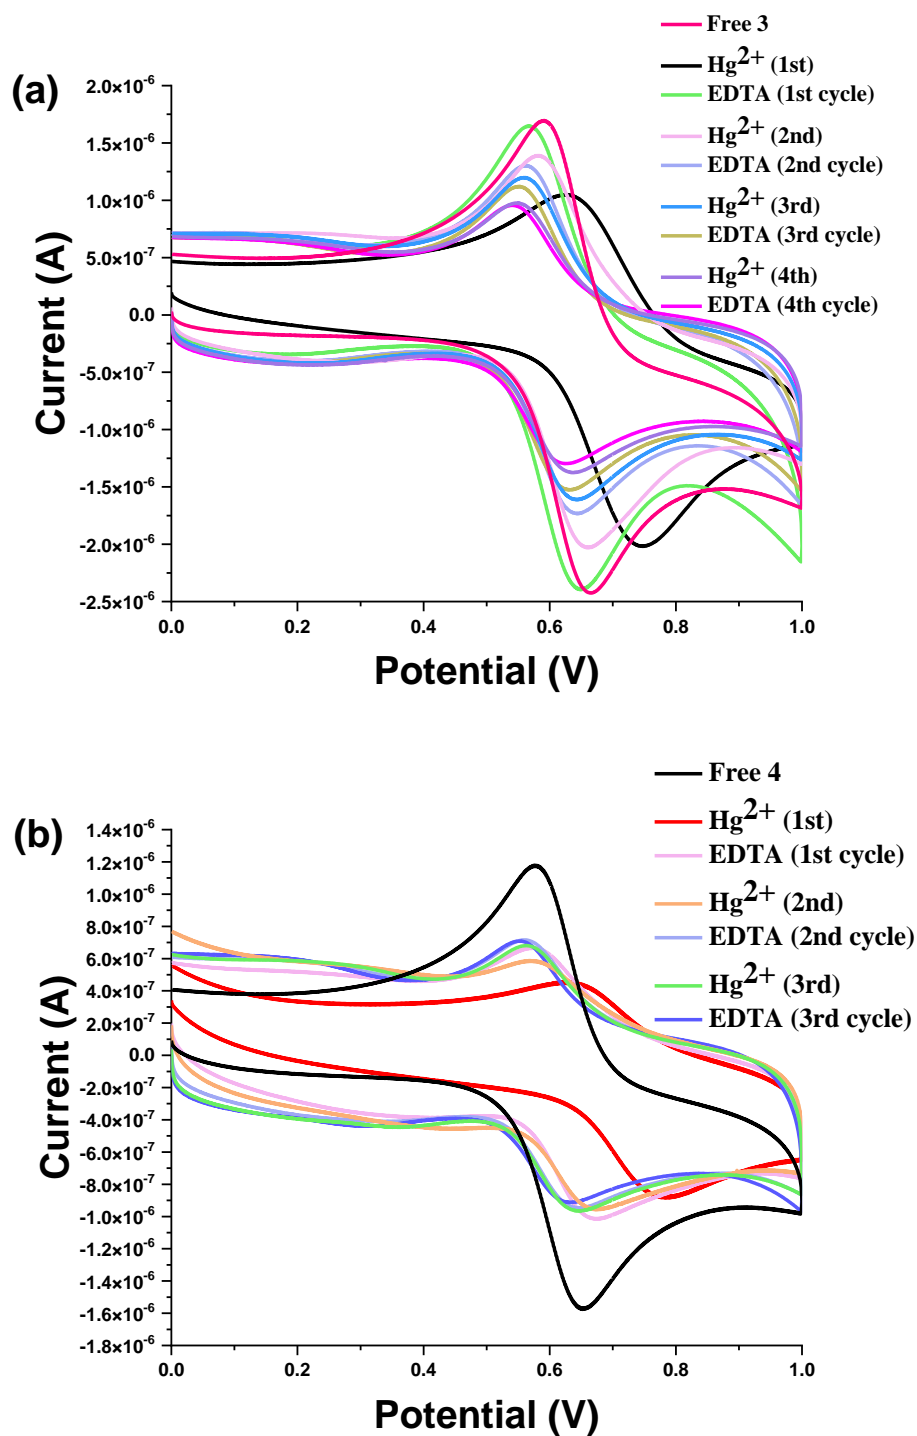

**Fig. S18:** Reversibility of the interactions of compounds (a) **3** ( $\text{CH}_3\text{CN}$ ,  $2.5 \times 10^{-4}$  M) and (b) **4** ( $\text{CH}_3\text{CN}$ ,  $2.5 \times 10^{-4}$  M) with  $\text{Hg}^{2+}$  ( $\text{CH}_3\text{CN}$ ,  $2.5 \times 10^{-4}$  M) tested by employing aqueous solution of  $\text{Na}_2\text{EDTA}$  ( $\text{H}_2\text{O}$ ,  $2.5 \times 10^{-4}$  M).

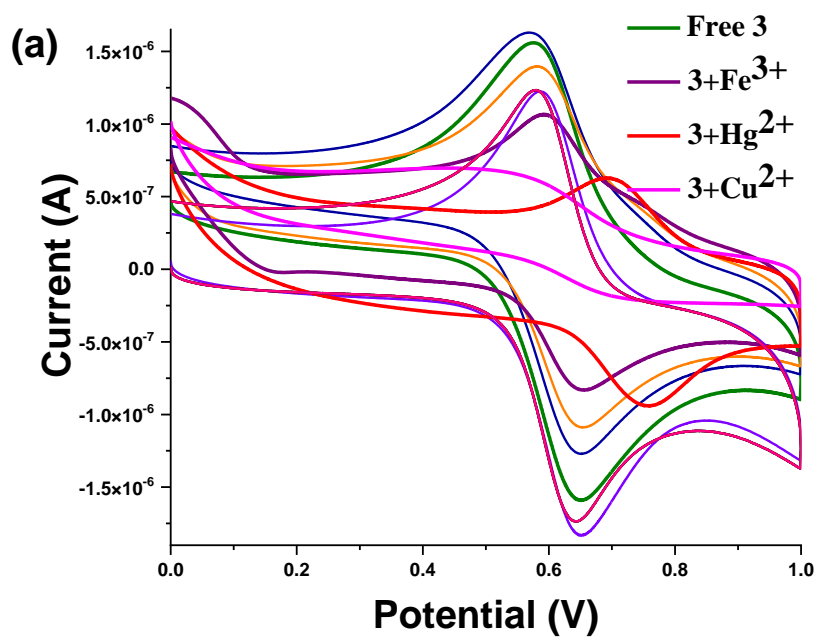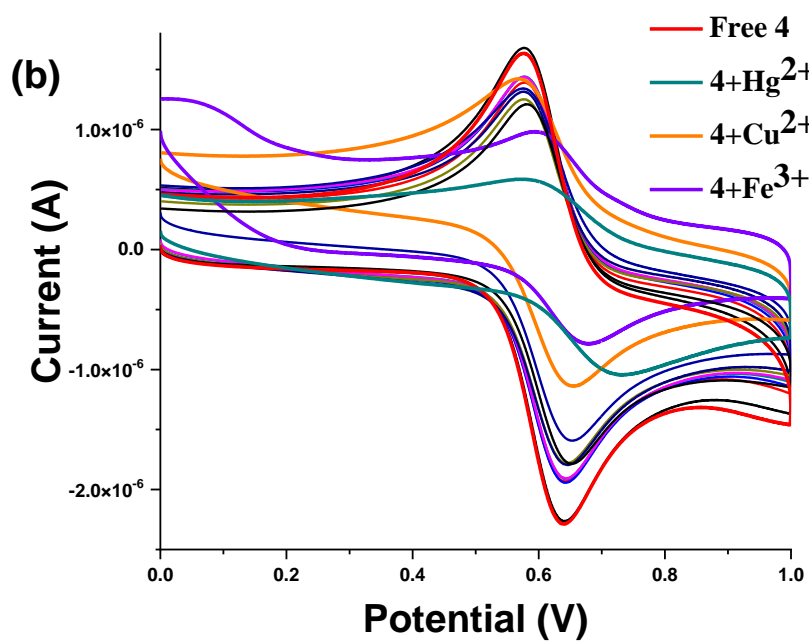

**Fig. S19:** CV of compounds (a) **3** ( $\text{CH}_3\text{CN}$ ,  $2.5 \times 10^{-4} \text{ M}$ ) and (b) **4** ( $\text{CH}_3\text{CN}$ ,  $2.5 \times 10^{-4} \text{ M}$ ) in presence of all metal ions ( $\text{CH}_3\text{CN}$ ,  $2.5 \times 10^{-4} \text{ M}$ ) under scan rate  $0.06 \text{ V s}^{-1}$ .

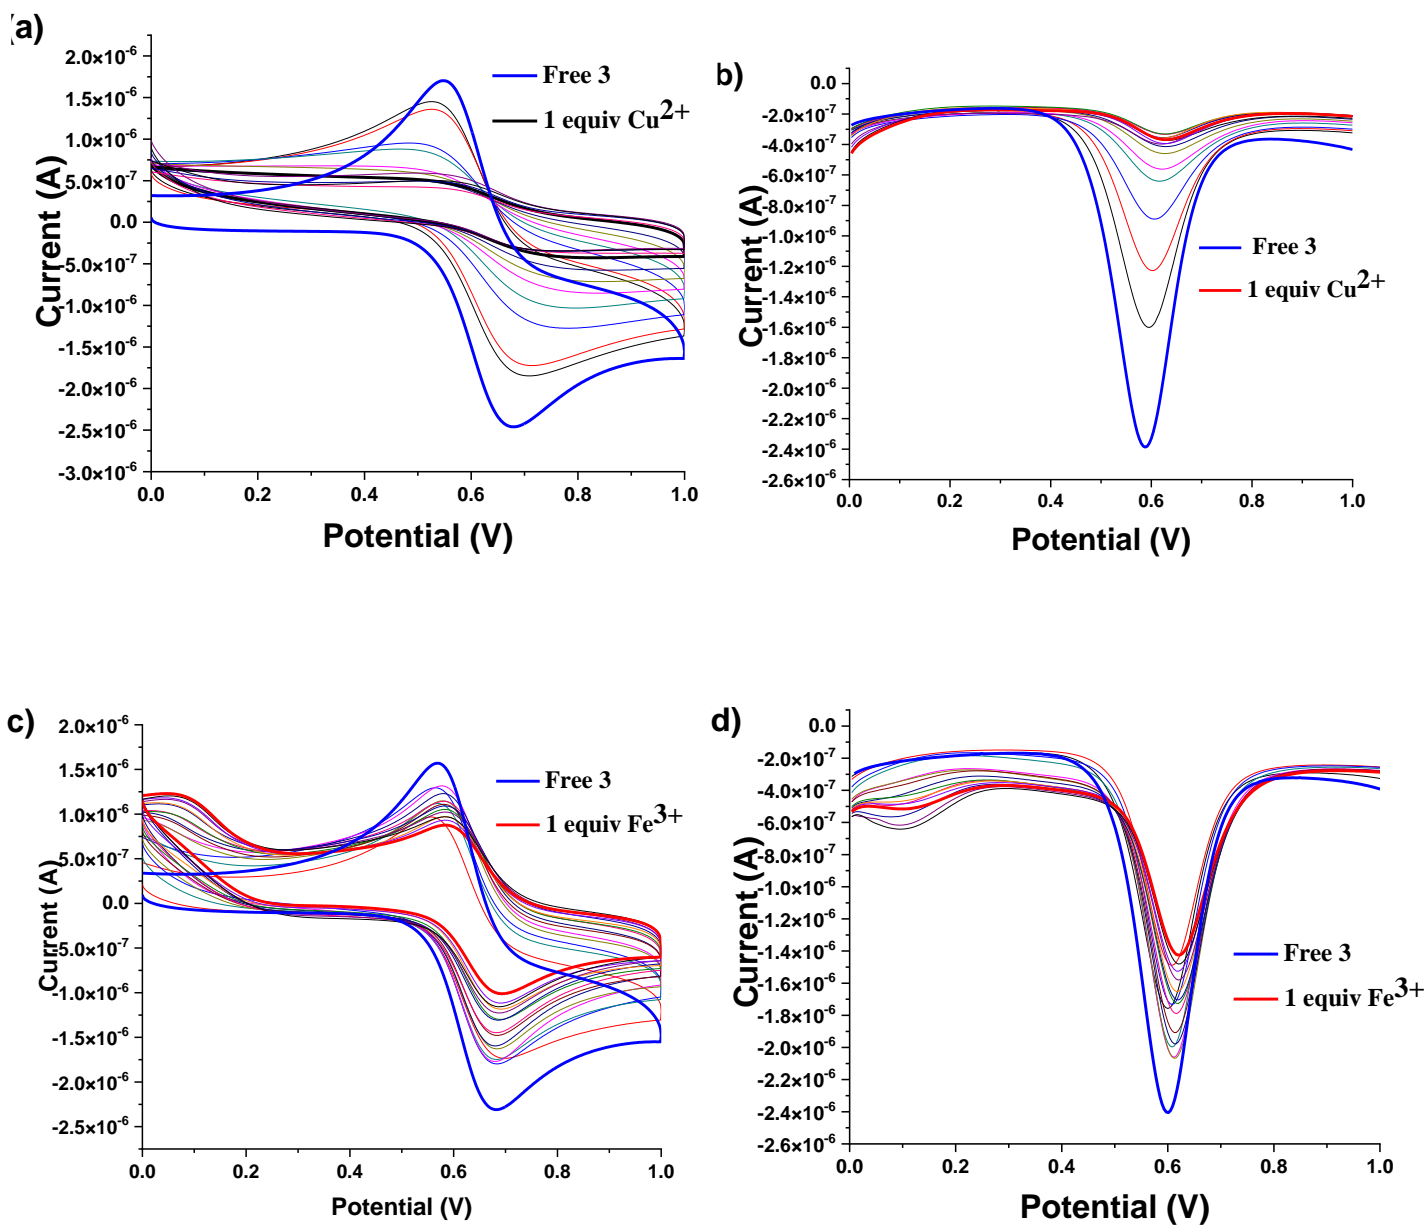

**Fig. S20:** CV and DPV of compound **3** ( $\text{CH}_3\text{CN}$ ,  $2.5 \times 10^{-4} \text{ M}$ ) in presence of up to (a), (b) 1 equiv  $\text{Cu}^{2+}$  ( $\text{CH}_3\text{CN}$ ,  $2.5 \times 10^{-4} \text{ M}$ ) and (c), (d)  $\text{Fe}^{3+}$  ions ( $\text{CH}_3\text{CN}$ ,  $2.5 \times 10^{-4} \text{ M}$ ) under scan rate  $0.06 \text{ V s}^{-1}$ .

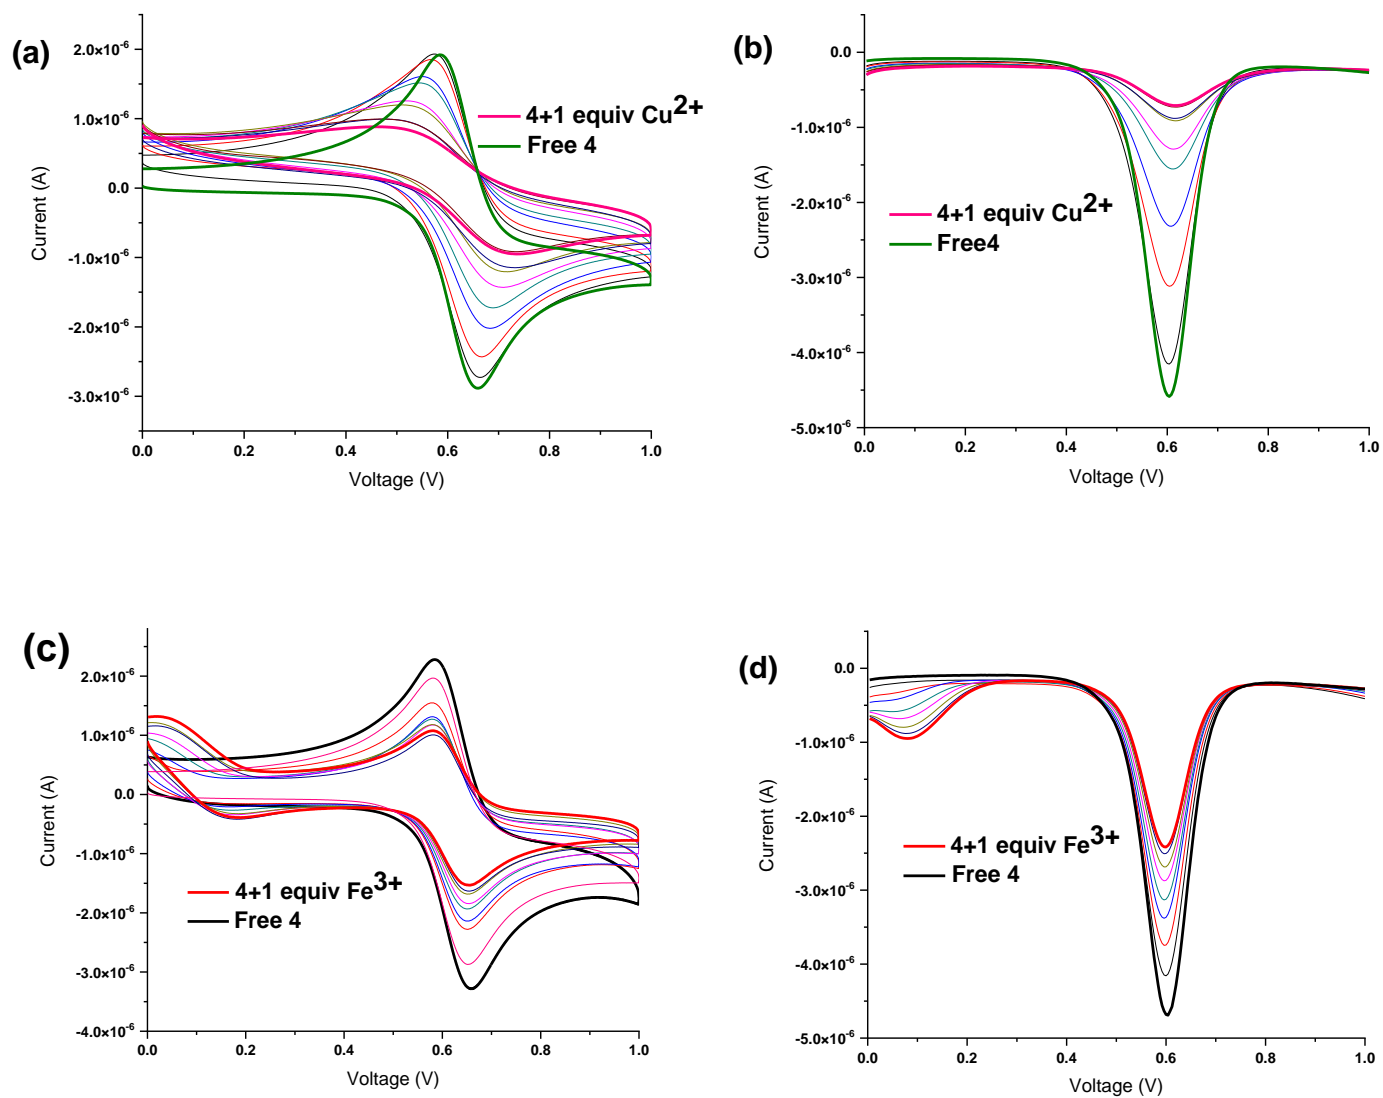

**Fig. S21:** CV and DPV of compound **4** (CH<sub>3</sub>CN, 2.5 × 10<sup>-4</sup> M) in presence of up to 1 equiv Cu<sup>2+</sup> (CH<sub>3</sub>CN, 2.5 × 10<sup>-4</sup> M) and Fe<sup>3+</sup> ions (CH<sub>3</sub>CN, 2.5 × 10<sup>-4</sup> M) under scan rate 0.06 V s<sup>-1</sup>.



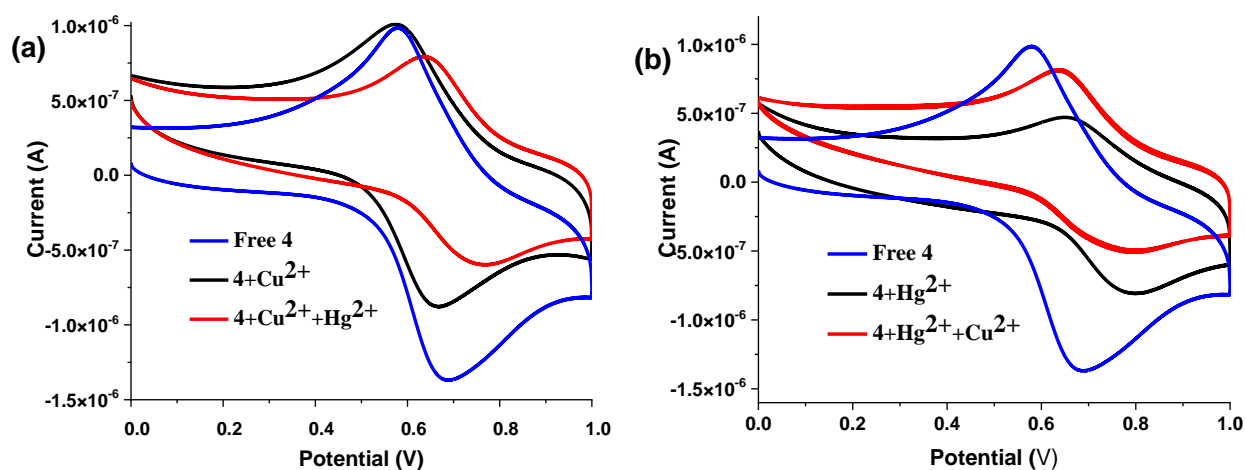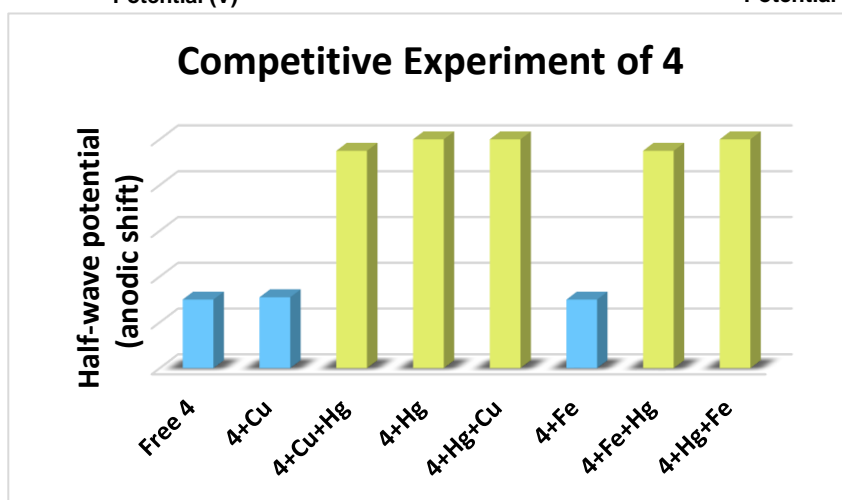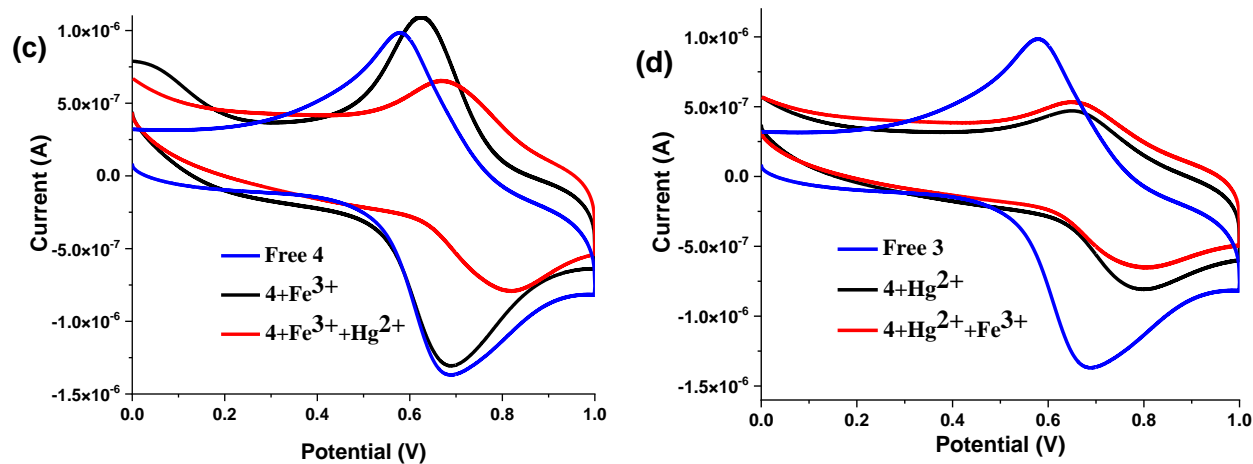

**Fig. S22:** Competition experiment of compound 4 (CH<sub>3</sub>CN, 2.5 × 10<sup>-4</sup> M) with (a), (b) Cu<sup>2+</sup>/Hg<sup>2+</sup> couple (CH<sub>3</sub>CN, 2.5 × 10<sup>-4</sup> M) and (c), (d) Fe<sup>3+</sup>/Hg<sup>2+</sup> couple (CH<sub>3</sub>CN, 2.5 × 10<sup>-4</sup> M) under scan rate 0.06 Vs<sup>-1</sup>.

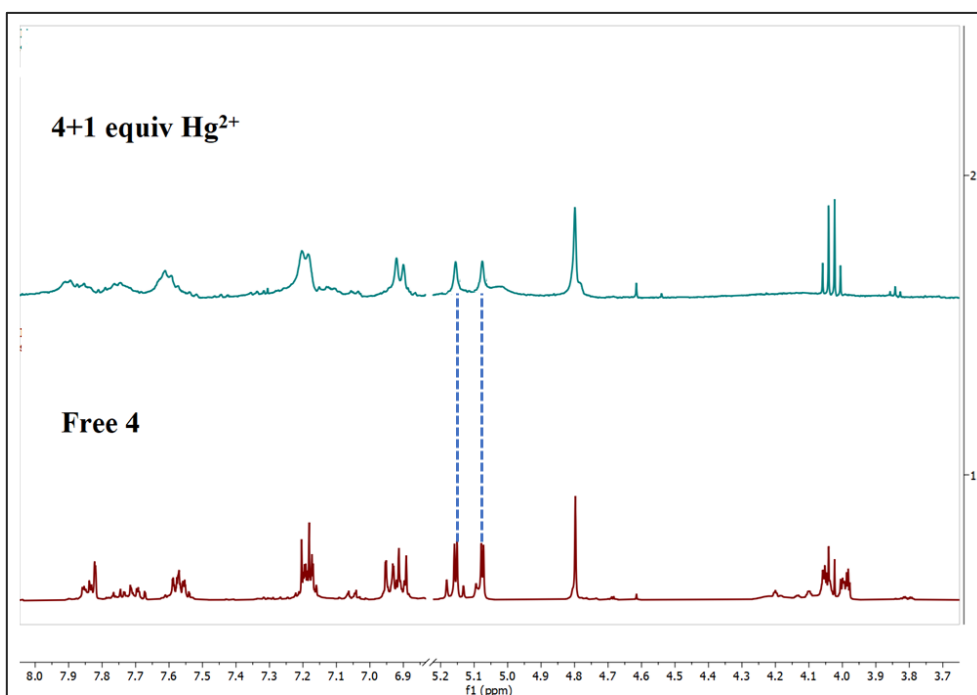

**Fig. S23.** <sup>1</sup>H NMR of compound **4** before and after addition of 1 equiv of Hg<sup>2+</sup> ion in CD<sub>3</sub>CN.

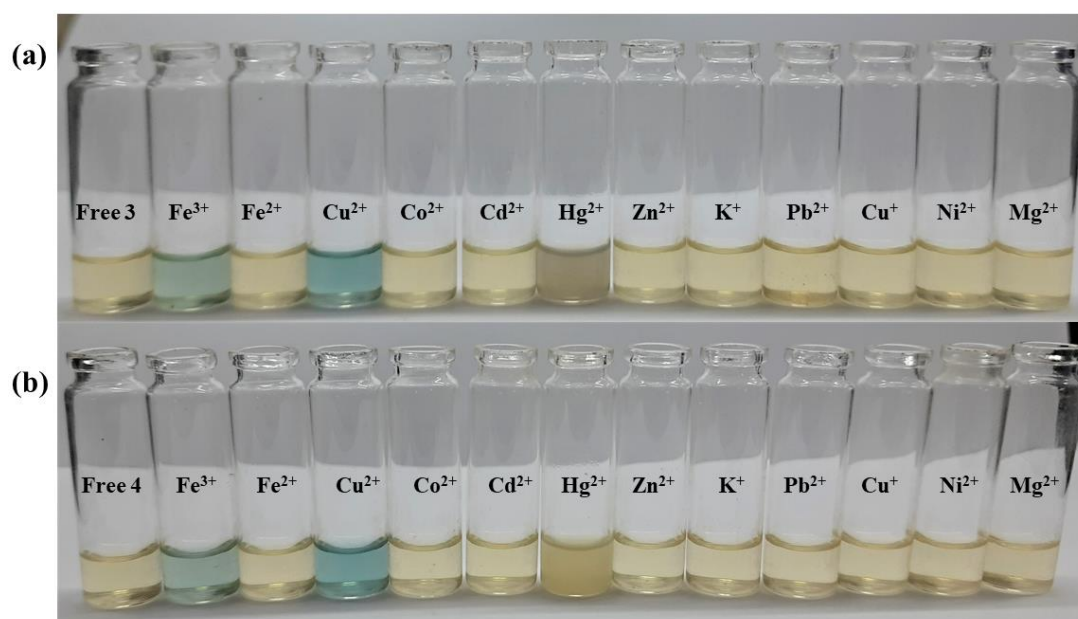

**Fig. S24.** Colorimetric test of (a) compound **3** ( $1 \times 10^{-3}$  M CH<sub>3</sub>CN) and (b) compound **4** ( $1 \times 10^{-3}$  M CH<sub>3</sub>CN) in presence of several metal ions ( $1 \times 10^{-4}$  M CH<sub>3</sub>CN) at neutral pH.

(a)

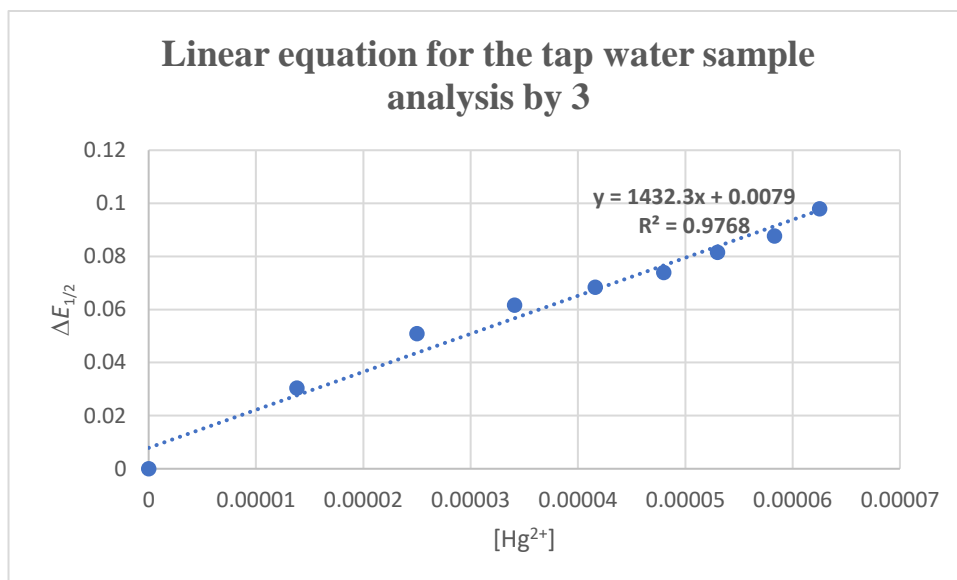

(b)

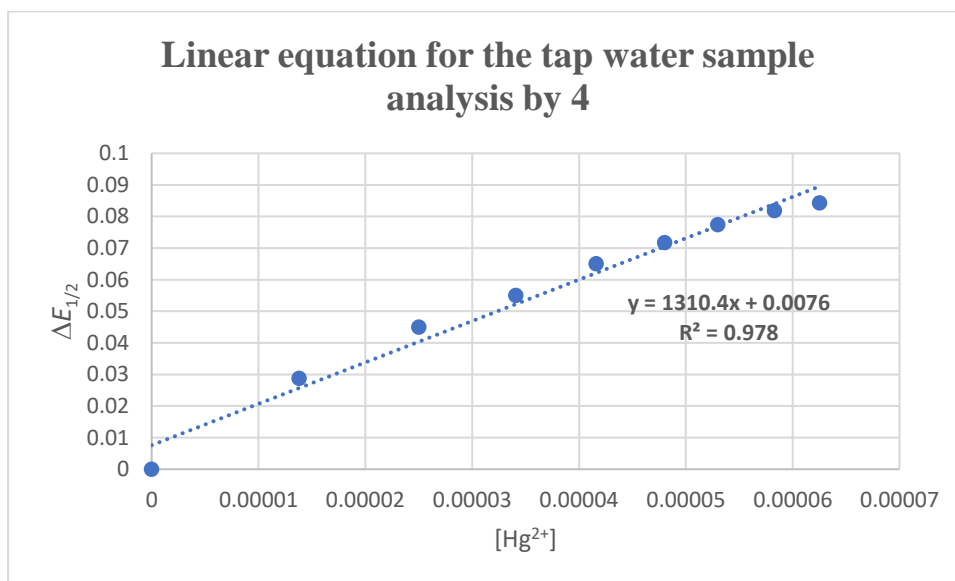

**Fig. S25:** Real sample analysis of tap water samples for the determination of  $Hg^{2+}$  ion by probes (a) **3** and (b) **4**.

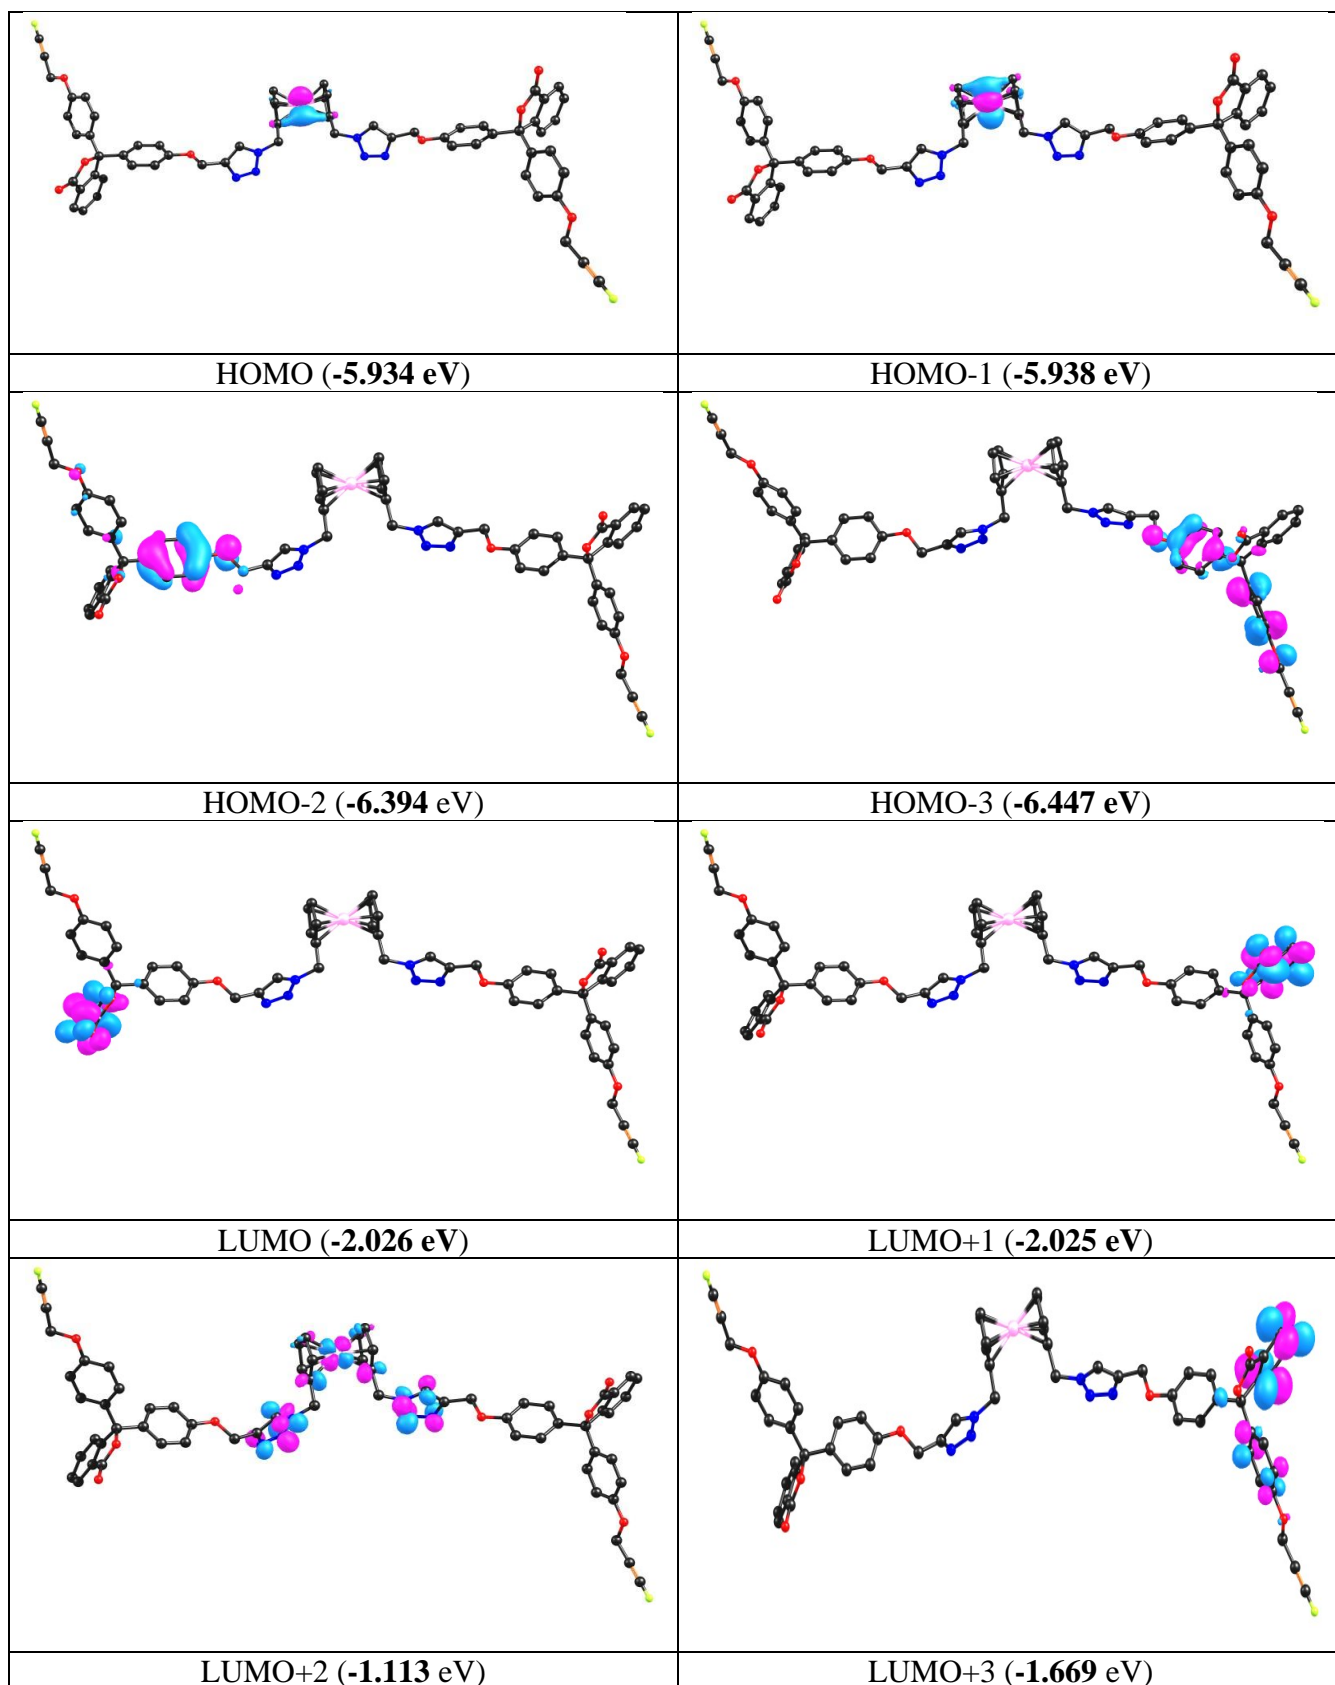

**Fig. S26:** Frontiers MOs of the acyclic ligand **3** with energy at B3LYP/lanl2dz / CPCM (acetonitrile) level. (iso value= 0.04)

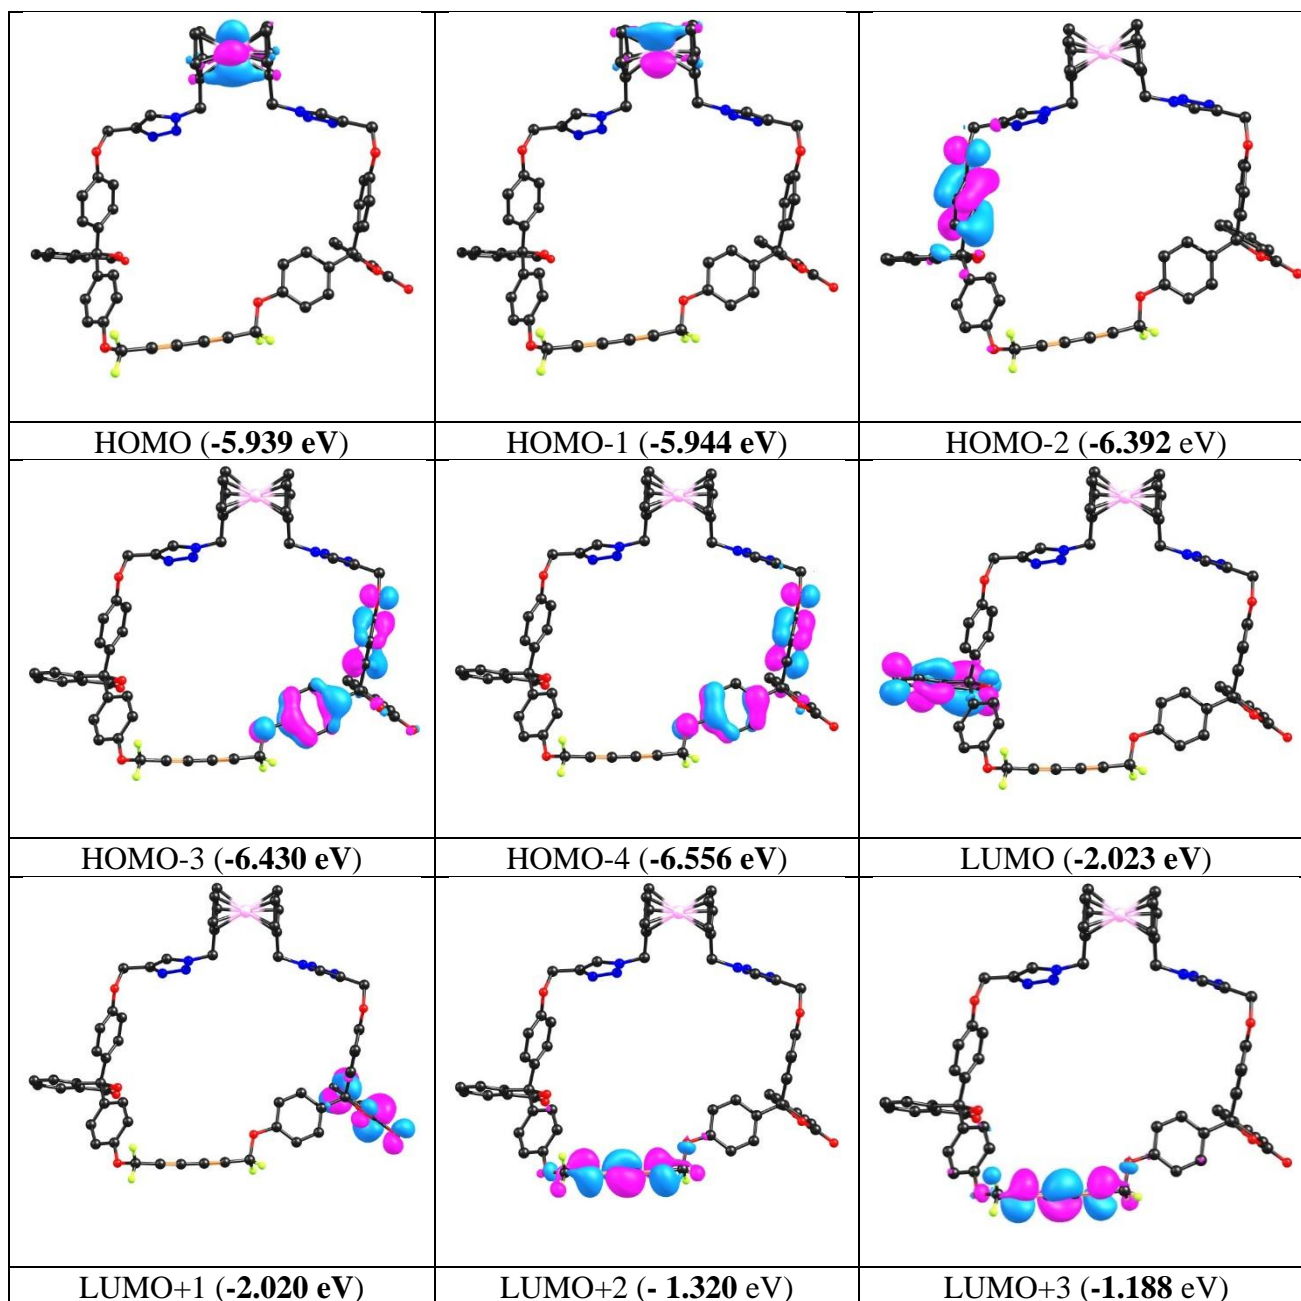

**Fig. S27:** Frontiers MOs of the cyclic ligand **4** with energy at B3LYP/ lan12dz / CPCM (acetonitrile) level. (iso value=0.04)

**Table S1.** The selected distances (Å) and Wiberg Bond Index (WBI) of ligand/receptor **3** and **4** (involving only terminal alkynes as a binding unit) calculated at B3LYP/lanl2dz/cpcm (acetonitrile) level (The zoomed portions of the primary binding core of **3** (left) and **4** (right) with atom labeling are shown below the table).

|                     | contact             | Distance (Å) | WBI   |
|---------------------|---------------------|--------------|-------|
| <i>Receptor [3]</i> | <b>C1-C2/ C4-C5</b> | 1.222        | 2.886 |
|                     | <b>C2-C3/ C5-C6</b> | 1.466        | 1.466 |
|                     | <b>C3-O1</b>        | 1.475        | 0.855 |
|                     | <b>C6-O2</b>        | 1.474        | 0.856 |
| <i>Receptor [4]</i> | <b>C1-C2</b>        | 1.469        | 1.084 |
|                     | <b>C2-C3</b>        | 1.228        | 2.614 |
|                     | <b>C3-C4</b>        | 1.374        | 1.239 |
|                     | <b>C4-C5</b>        | 1.227        | 2.608 |
|                     | <b>C5-C6</b>        | 1.462        | 1.088 |
|                     | <b>C1-O1</b>        | 1.473        | 0.859 |
|                     | <b>C6-O2</b>        | 1.475        | 0.853 |

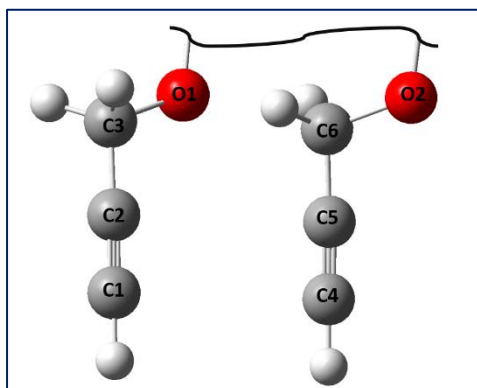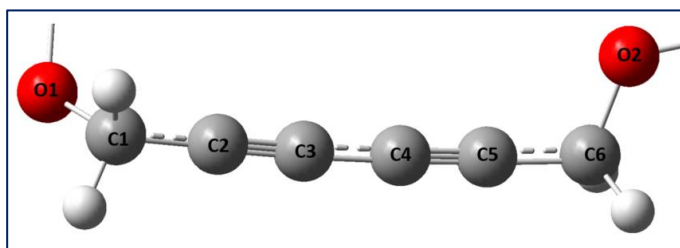

**Table S2.** The selected distances (Å) and Wiberg Bond Index (WBI) of  $[3 \cdot 2\text{Hg}^{2+}]$  and  $[4 \cdot \text{Hg}^{2+}]$  (involving only terminal alkynes and nearby  $-\text{O}-\text{CH}_2-$  as a binding unit) calculated at B3LYP/lanl2dz/cpcm (acetonitrile) level (The zoomed portions of the primary binding core of  $[3 \cdot 2\text{Hg}^{2+}]$  (left) and  $[4 \cdot \text{Hg}^{2+}]$  (right) with atom labelling are shown below the table).

| Receptor $[3 \cdot 2\text{Hg}^{2+}]$ |             |        | Receptor $[4 \cdot \text{Hg}^{2+}]$ |                       |        |                        |        |
|--------------------------------------|-------------|--------|-------------------------------------|-----------------------|--------|------------------------|--------|
| contact                              | distance(Å) | WBI    | contact                             | Left side alkyne unit |        | Right side alkyne unit |        |
|                                      |             |        |                                     | distance(Å)           | WBI    | distance(Å)            | WBI    |
| <b>C1-C2</b>                         | 1.226       | 2.859  | <b>C1-O1</b>                        | 1.471                 | 0.861  | 1.471                  | 0.861  |
| <b>C2-C3</b>                         | 1.462       | 1.088  | <b>C1-C2</b>                        | 1.470                 | 1.081  | 1.470                  | 1.083  |
| <b>C3-O1</b>                         | 1.502       | 0.831  | <b>C2-C3</b>                        | 1.229                 | 2.604  | 1.228                  | 2.604  |
| <b>C4-C5</b>                         | 1.224       | 2.866  | <b>C3-C4</b>                        | 1.375                 | 1.237  | 1.374                  | 1.237  |
| <b>C5-C6</b>                         | 1.461       | 1.086  | <b>C4-C5</b>                        | 1.227                 | 2.612  | 1.228                  | 2.609  |
| <b>C6-O2</b>                         | 1.496       | 0.836  | <b>C5-C6</b>                        | 1.463                 | 1.087  | 1.463                  | 1.085  |
| <b>C1-Hg1</b>                        | 3.300       | 0.0157 | <b>C6-O2</b>                        | 1.474                 | 0.855  | 1.474                  | 0.855  |
| <b>C2-Hg1</b>                        | 3.019       | 0.0170 | <b>C2-Hg1</b>                       | 3.697                 | 0.0063 | -----                  | -----  |
| <b>O1-Hg1</b>                        | 2.844       | 0.0412 | <b>C3-Hg1</b>                       | 3.668                 | 0.0072 | -----                  | -----  |
| <b>C4-Hg2</b>                        | 3.402       | 0.0120 | <b>C4-Hg1</b>                       | -----                 | -----  | 3.654                  | 0.0070 |
| <b>C5-Hg2</b>                        | 3.143       | 0.0128 | <b>C5-Hg1</b>                       | -----                 | -----  | 3.662                  | 0.0063 |
| <b>O2-Hg2</b>                        | 2.944       | 0.0340 |                                     |                       |        |                        |        |

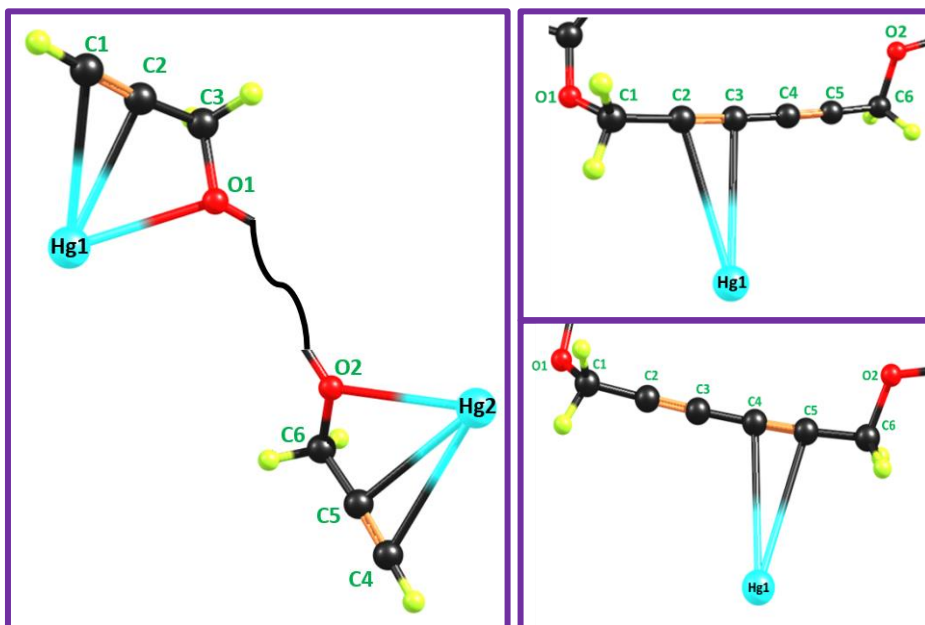



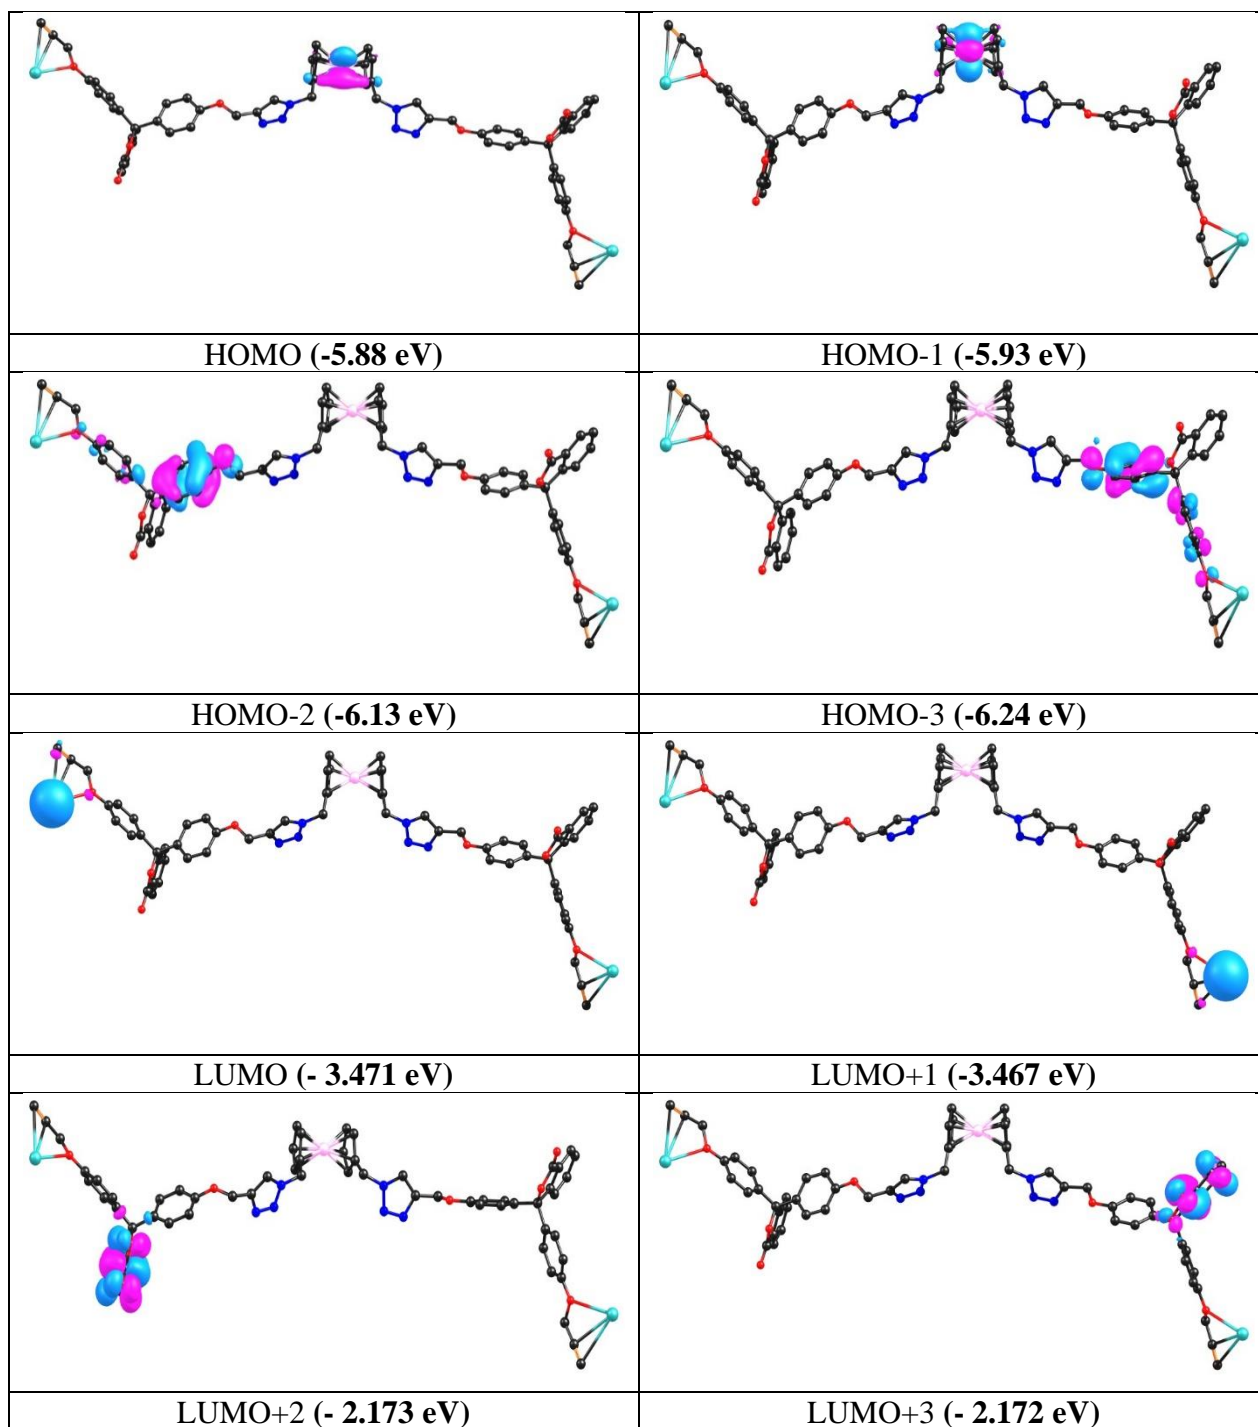

**Fig. S28:** Frontiers MOs of the free ligand [3·2Hg<sup>2+</sup>] with energy at B3LYP/lanl2dz / CPCM (acetonitrile) level. (iso value=0.04)

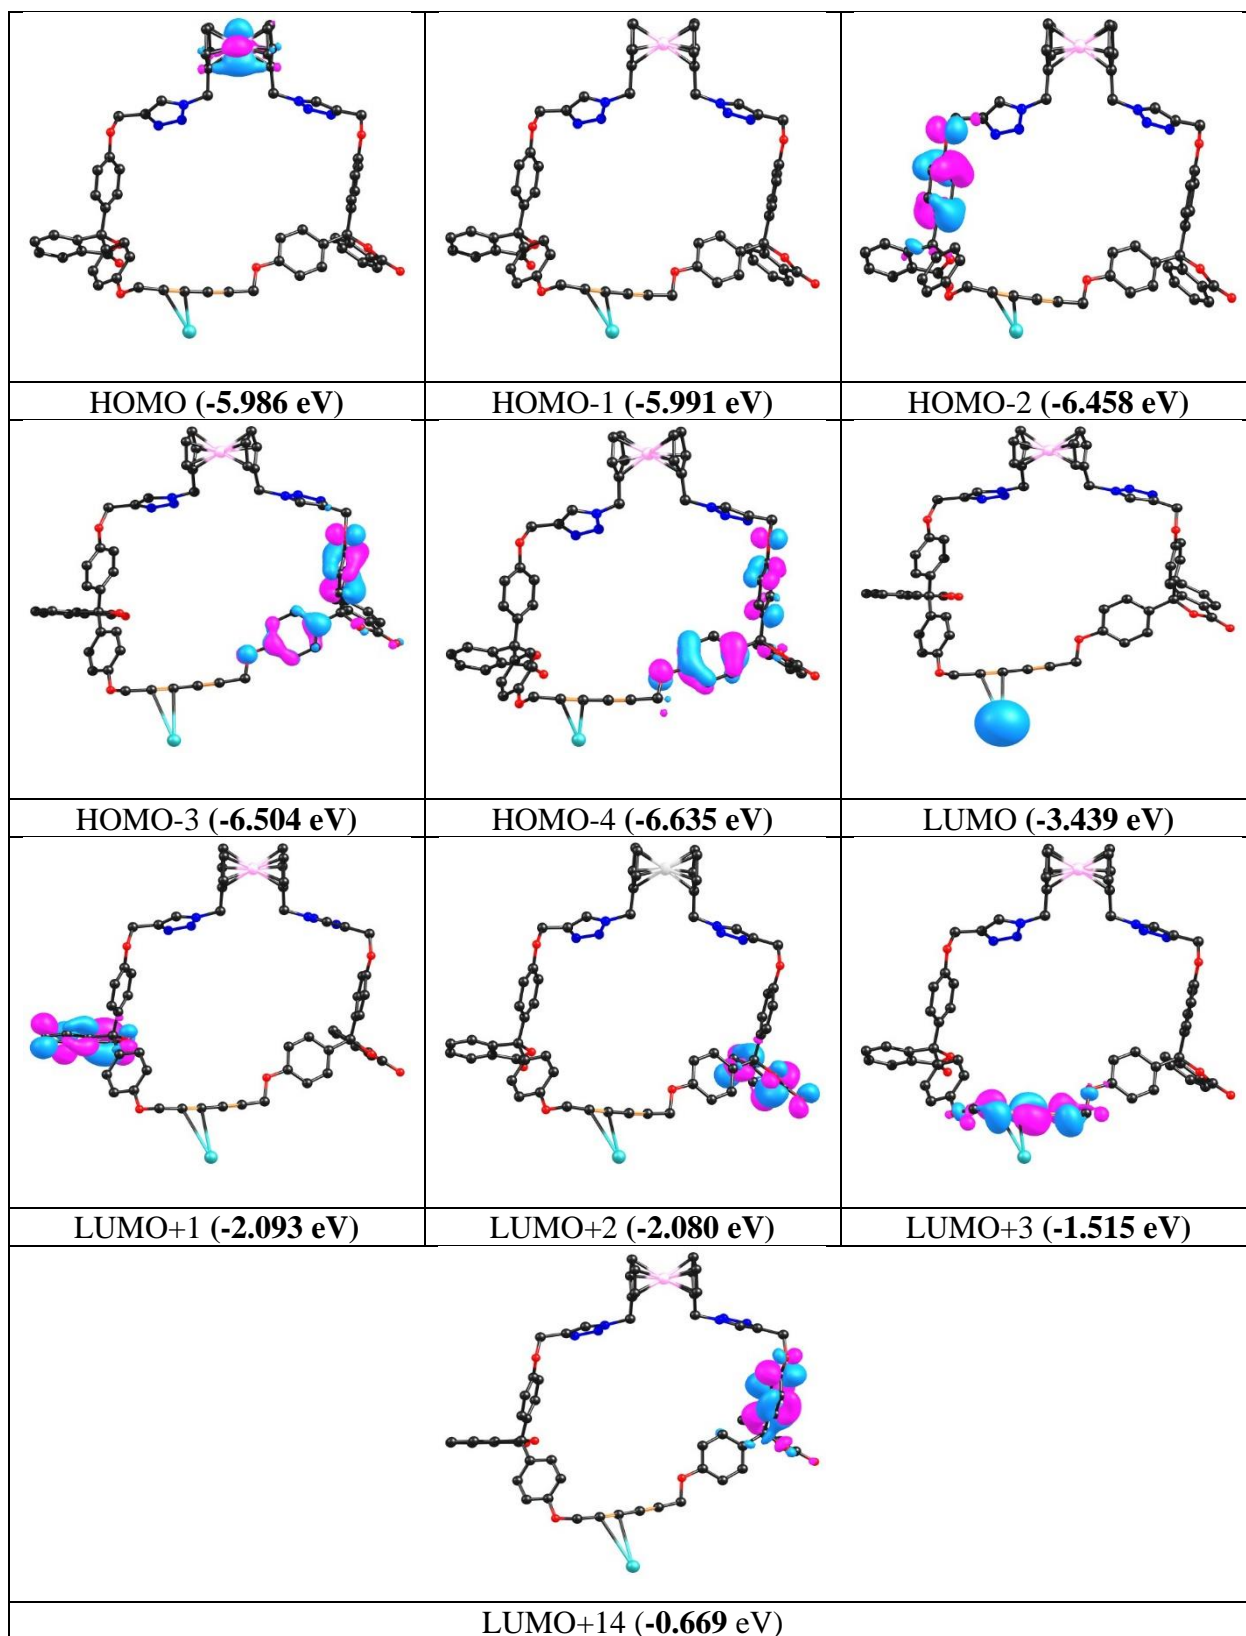

**Fig. S29:** Frontiers MOs of the free ligand [4·Hg<sup>2+</sup>] with energy at B3LYP/lanl2dz / CPCM (acetonitrile) level. (iso value=0.04) (left side)

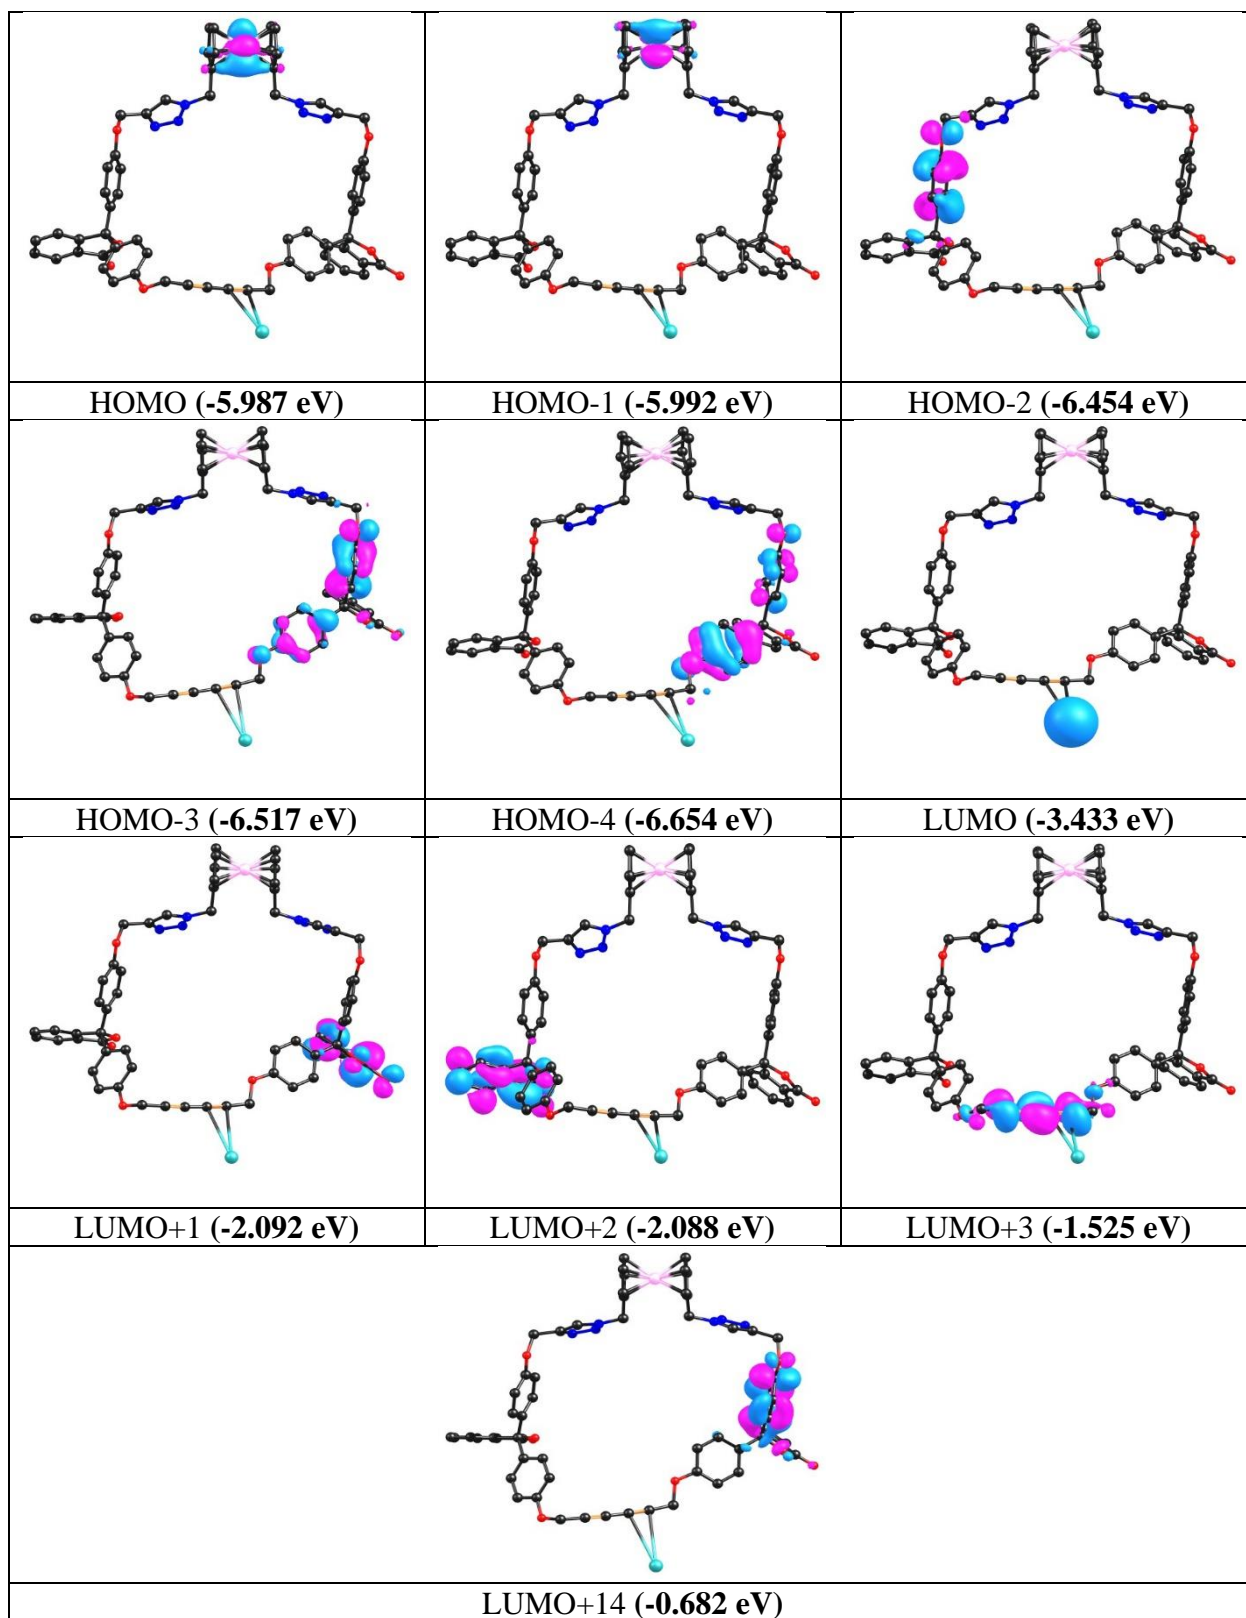

**Fig. S30:** Frontiers MOs of the free ligand [4·Hg<sup>2+</sup>] with energy at B3LYP/lanl2dz / CPCM (acetonitrile) level. (iso value=0.04) (right side)

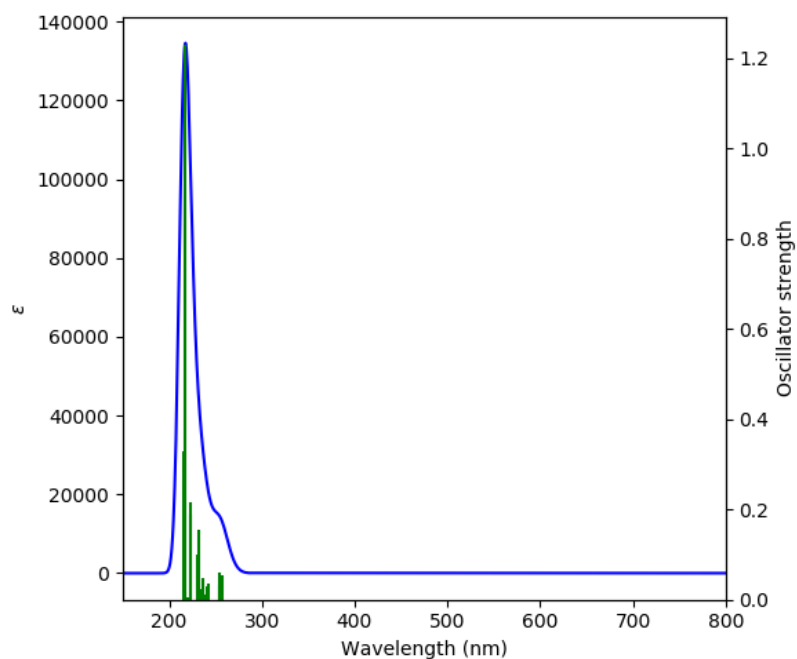

**Fig. S31:** Calculated absorption spectrum of the ligand/receptor **3**

**Table S3.** Major excited state transitions of the ligand/receptor **3** with Osc. Strength and  $\lambda_{\text{ex}}$ .

| $\lambda_{\text{ex}}$ (nm)<br>(Exp.) <sup>a</sup> | $\lambda_{\text{ex}}$ (nm)<br>(Calc.) <sup>b</sup> | Oscillator<br>Strength ( <i>f</i> ) | Major Transitions <sup>c</sup>                                                             |
|---------------------------------------------------|----------------------------------------------------|-------------------------------------|--------------------------------------------------------------------------------------------|
| 227                                               | 216.5                                              | 1.2303                              | H-4 $\rightarrow$ L+10 (32%), H-3 $\rightarrow$ L+10 (19%)                                 |
| 273                                               | 253.6                                              | 0.0615                              | H-27 $\rightarrow$ L+1 (13%), H-13 $\rightarrow$ L+1 (29%),<br>H-4 $\rightarrow$ L+1 (32%) |
| 281                                               | 257.1                                              | 0.0556                              | H-28 $\rightarrow$ L (16%), H-12 $\rightarrow$ L (15%), H-2 $\rightarrow$ L<br>(52%)       |

<sup>a</sup>Experimental wavelength in acetonitrile. <sup>b</sup>TD-DFT calculated wavelength of ligand **3** in acetonitrile. <sup>c</sup>Transitions with greater than 10% contribution are represented.

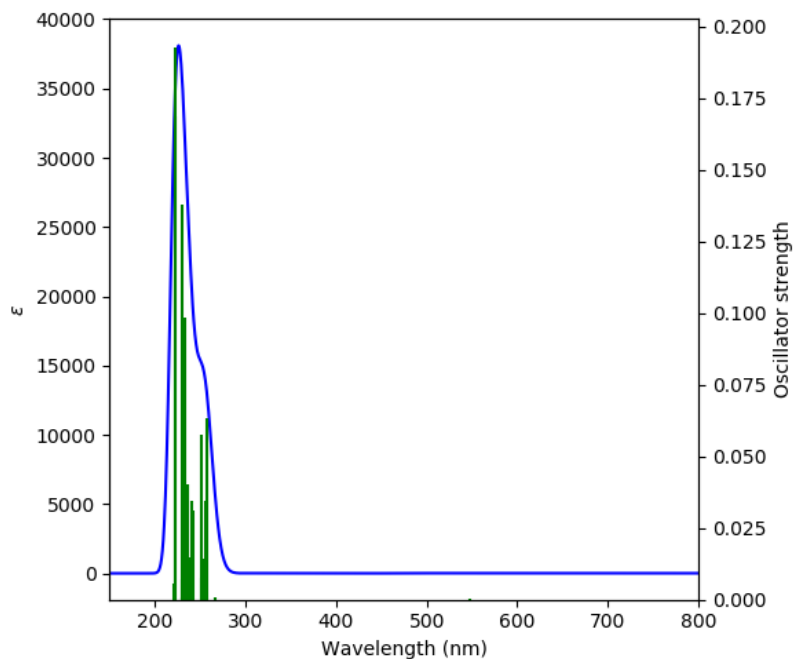

**Fig. S32:** Calculated absorption spectrum of the ligand/receptor **4**

**Table S4.** Major excited state transitions of the ligand/receptor **4** with Osc. Strength and  $\lambda_{\text{ex}}$ .

| $\lambda_{\text{ex}}$ (nm)<br>(Exp.) <sup>a</sup> | $\lambda_{\text{ex}}$ (nm)<br>(Calc.) <sup>b</sup> | Oscillator<br>Strength ( <i>f</i> ) | Major Transitions <sup>c</sup>                                                             |
|---------------------------------------------------|----------------------------------------------------|-------------------------------------|--------------------------------------------------------------------------------------------|
| 227                                               | 223.0                                              | 0.193                               | H-18 $\rightarrow$ L+1 (62%)                                                               |
| 273                                               | 252.1                                              | 0.0575                              | H-26 $\rightarrow$ L+1 (24%), H-14 $\rightarrow$ L+1 (26%), H-4<br>$\rightarrow$ L+1 (24%) |
| 281                                               | 257.3                                              | 0.0633                              | H-15 $\rightarrow$ L (16%), H-1 $\rightarrow$ L (52%)                                      |

<sup>a</sup>Experimental wavelength in acetonitrile. <sup>b</sup>TD-DFT calculated wavelength of ligand **4** in acetonitrile. <sup>c</sup>Transitions with greater than 10% contribution are represented.

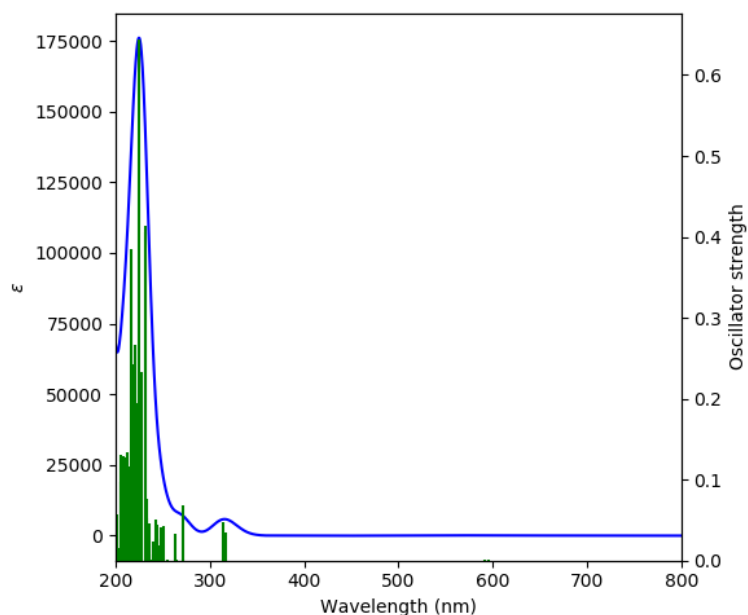

**Fig. S33:** Calculated absorption spectrum of the complex  $[3 \cdot 2\text{Hg}^{2+}]$

**Table S5.** Major excited state transitions of  $[3 \cdot 2\text{Hg}^{2+}]$  (involving only terminal alkynes and nearby  $-\text{O}-\text{CH}_2-$  atom as a binding unit) with Osc. Strength and  $\lambda_{\text{ex}}$ .

| $\lambda_{\text{ex}}$ (nm)<br>(Exp.) <sup>a</sup> | $\lambda_{\text{ex}}$ (nm)<br>(Calc.) <sup>b</sup> | Oscillator<br>Strength ( <i>f</i> ) | Major Contributions <sup>c</sup>                                                                                     |
|---------------------------------------------------|----------------------------------------------------|-------------------------------------|----------------------------------------------------------------------------------------------------------------------|
| 231                                               | 225.2                                              | 0.6445                              | H-1 $\rightarrow$ L+12 (25%), H-4 $\rightarrow$ L+3 (14%), H-1 $\rightarrow$ L+9 (18%), H-1 $\rightarrow$ L+16 (13%) |
|                                                   | 231.26                                             | 0.4055                              | H-5 $\rightarrow$ L+2 (23%), HOMO $\rightarrow$ L+8 (15%)                                                            |
| 274                                               | 251.2                                              | 0.0426                              | HOMO $\rightarrow$ L+5 (18%), HOMO $\rightarrow$ L+14 (12%), HOMO $\rightarrow$ L+17 (44%)                           |
|                                                   | 263.6                                              | 0.0339                              | H-1 $\rightarrow$ L+3 (84%)                                                                                          |
| 281                                               | 271.2                                              | 0.0676                              | HOMO $\rightarrow$ L+2 (88%)                                                                                         |
|                                                   | 314.5                                              | 0.0468                              | H-5 $\rightarrow$ LUMO (62%), HOMO $\rightarrow$ LUMO (34%)                                                          |
|                                                   | 316.9                                              | 0.0343                              | H-4 $\rightarrow$ L+1 (54%), H-1 $\rightarrow$ L+1 (41%)                                                             |

<sup>a</sup>Experimental wavelength in acetonitrile. <sup>b</sup>TD-DFT calculated wavelength of complex  $[3 \cdot 2\text{Hg}^{2+}]$  in acetonitrile. <sup>c</sup>Transitions with greater than 10% contribution are presented.

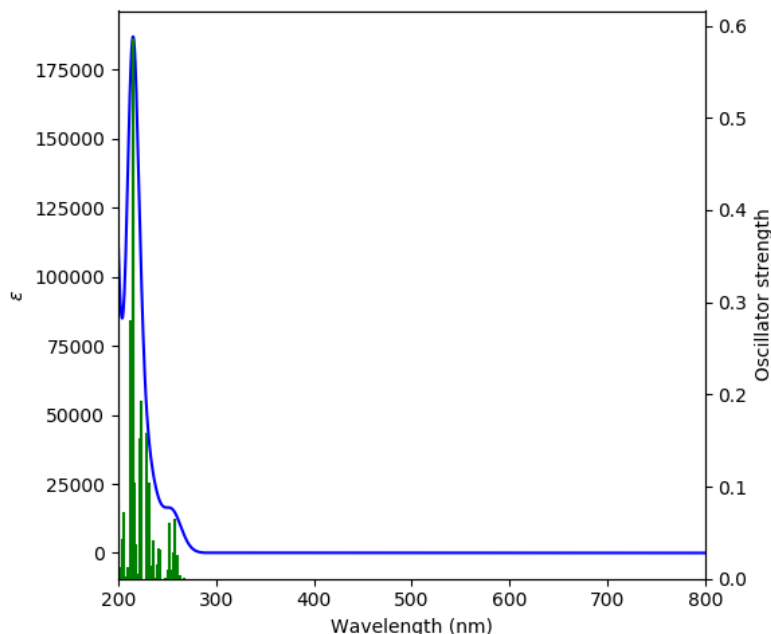

**Fig. S34:** Calculated absorption spectrum of the complex  $[4 \cdot \text{Hg}^{2+}]$ .

**Table S6.** Major excited state transitions of  $[4 \cdot \text{Hg}^{2+}]$  (involving only conjugated alkynes as a binding unit) with Osc. Strength and  $\lambda_{\text{ex}}$ .

| $\lambda_{\text{ex}}$ (nm)<br>(Exp.) <sup>a</sup> | $\lambda_{\text{ex}}$ (nm)<br>(Calc.) <sup>b</sup> | Oscillator<br>Strength ( <i>f</i> ) | Major Contributions <sup>c</sup>                                                           |
|---------------------------------------------------|----------------------------------------------------|-------------------------------------|--------------------------------------------------------------------------------------------|
| 230                                               | 215.5                                              | 0.6378                              | H-4 $\rightarrow$ L+14 (16%), H-3 $\rightarrow$ L+14 (41%)                                 |
| 273                                               | 251.9                                              | 0.0644                              | H-26 $\rightarrow$ L+1 (19%), H-14 $\rightarrow$ L+1 (27%), H-4<br>$\rightarrow$ L+1 (27%) |
| 281                                               | 257.4                                              | 0.0644                              | H-13 $\rightarrow$ L+2 (15%), H-2 $\rightarrow$ L+2 (57%)                                  |

<sup>a</sup>Experimental wavelength in acetonitrile. <sup>b</sup>TD-DFT calculated wavelength of complex  $[4 \cdot \text{Hg}^{2+}]$  (right side alkyne unit) in acetonitrile. <sup>c</sup>Transitions with greater than 10% contribution are presented.

| $\lambda_{\text{ex}}$ (nm)<br>(Exp.) <sup>a</sup> | $\lambda_{\text{ex}}$ (nm)<br>(Calc.) <sup>b</sup> | Oscillator<br>Strength ( <i>f</i> ) | Major Contributions <sup>c</sup>                                                              |
|---------------------------------------------------|----------------------------------------------------|-------------------------------------|-----------------------------------------------------------------------------------------------|
| 230                                               | 215.4                                              | 0.5868                              | H-4- $\rightarrow$ L+14 (20%), H-3- $\rightarrow$ L+14 (42%)                                  |
| 273                                               | 251.9                                              | 0.0601                              | H-25- $\rightarrow$ L+2 (19%), H-14- $\rightarrow$ L+2 (24%), H-4-<br>$\rightarrow$ L+2 (25%) |
| 281                                               | 257.4                                              | 0.0649                              | H-13- $\rightarrow$ L+1 (14%), H-2- $\rightarrow$ L+1 (57%)                                   |

<sup>a</sup>Experimental wavelength in acetonitrile. <sup>b</sup>TD-DFT calculated wavelength of complex  $[4 \cdot \text{Hg}^{2+}]$  (left side alkyne unit) in acetonitrile. <sup>c</sup>Transitions with greater than 10% contribution are presented.

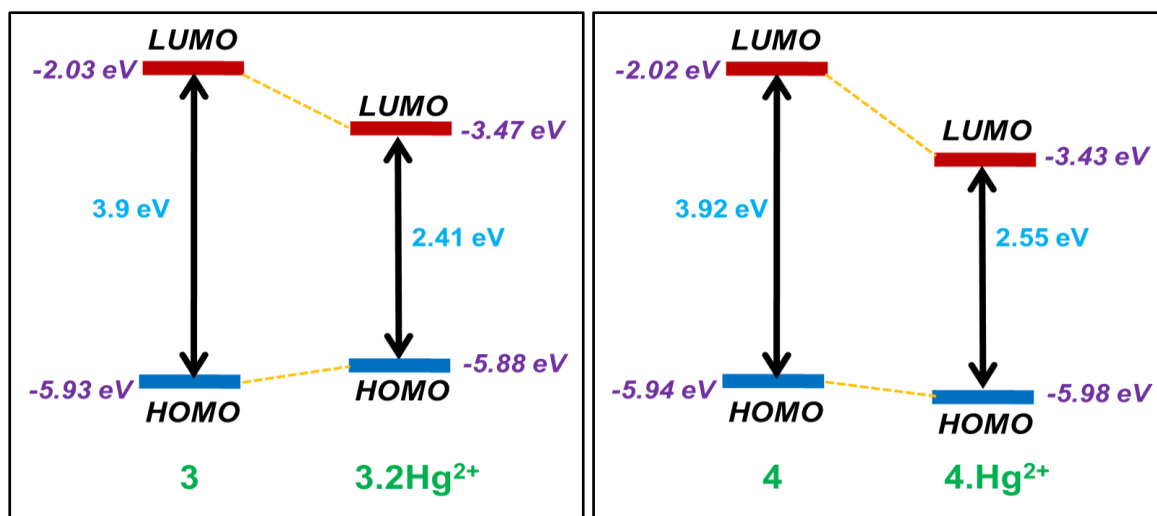

**Fig. S35:** Energy diagram of the frontier molecular orbitals of receptor **3** and [**3**·2Hg<sup>2+</sup>] (left) and that of receptor **4** and [**4**·Hg<sup>2+</sup>] (right) as obtained from DFT calculations.



**Table S7.** DFT Optimized coordinates of all the compounds.

.....  
*Ligand/Receptor 3*  
.....  
**Electronic Energy: -3520.714616 a.u.; EE + Free Energy Correction: -3519.857175 a.u.**  
.....

|   |              |               |              |   |              |               |              |
|---|--------------|---------------|--------------|---|--------------|---------------|--------------|
| C | 11.835709000 | 5.892083000   | 6.052102000  | C | 4.422036000  | -11.468685000 | -1.940687000 |
| C | -2.657700000 | -20.156587000 | -8.863806000 | N | 5.620088000  | -11.694769000 | -1.273066000 |
| O | 11.094324000 | 6.666755000   | 5.040231000  | N | 6.502542000  | -10.745509000 | -1.617435000 |
| O | -2.549032000 | -18.787468000 | -8.325776000 | N | 5.852974000  | -9.904769000  | -2.517817000 |
| C | 11.116783000 | 6.201769000   | 3.717562000  | C | 4.572182000  | -10.327852000 | -2.731656000 |
| C | -2.010821000 | -18.630942000 | -7.042568000 | C | 14.492475000 | 6.370673000   | -1.778812000 |
| C | 10.395375000 | 6.980805000   | 2.789663000  | C | 14.007632000 | 7.268891000   | -2.759628000 |
| C | 10.355308000 | 6.604410000   | 1.440460000  | C | 12.624459000 | 7.414655000   | -2.967537000 |
| C | 11.022012000 | 5.441709000   | 0.993947000  | C | 11.759772000 | 6.641407000   | -2.175436000 |
| C | 11.736941000 | 4.672915000   | 1.932934000  | C | 12.235835000 | 5.745370000   | -1.204339000 |
| C | 11.792499000 | 5.041426000   | 3.289684000  | C | 13.612158000 | 5.600873000   | -0.990075000 |
| C | -1.929115000 | -17.298759000 | -6.580491000 | C | 10.283816000 | 6.619606000   | -2.176174000 |
| C | -1.401777000 | -17.034366000 | -5.313322000 | O | 9.866636000  | 5.731823000   | -1.175746000 |
| C | -0.948828000 | -18.084187000 | -4.476930000 | C | 11.060853000 | 5.065090000   | -0.494313000 |
| C | -1.045542000 | -19.405387000 | -4.950160000 | O | 9.466107000  | 7.234032000   | -2.880778000 |
| C | -1.566841000 | -19.689508000 | -6.227260000 | C | 10.918291000 | 3.566652000   | -0.765538000 |
| C | 1.608435000  | -20.701715000 | -1.596914000 | C | 9.920987000  | 2.832516000   | -0.077065000 |
| C | 0.761288000  | -21.012737000 | -0.506420000 | C | 9.703590000  | 1.479180000   | -0.350716000 |
| C | -0.419131000 | -20.278914000 | -0.292577000 | C | 10.487824000 | 0.822787000   | -1.326221000 |
| C | -0.717382000 | -19.244017000 | -1.194254000 | C | 11.482390000 | 1.536374000   | -2.023822000 |
| C | 0.117113000  | -18.934510000 | -2.280824000 | C | 11.683738000 | 2.900759000   | -1.740398000 |
| C | 1.296500000  | -19.658978000 | -2.494128000 | O | 10.197907000 | -0.529894000  | -1.521957000 |
| C | -1.867519000 | -18.319184000 | -1.185014000 | C | 10.981160000 | -1.273371000  | -2.536241000 |
| O | -1.708491000 | -17.425218000 | -2.252277000 | C | 10.526004000 | -2.691578000  | -2.521947000 |
| C | -0.459438000 | -17.751469000 | -3.065829000 | N | 11.120085000 | -3.647329000  | -1.705889000 |
| O | -2.844658000 | -18.250487000 | -0.421516000 | N | 10.512022000 | -4.827528000  | -1.895017000 |
| C | 0.477408000  | -16.536563000 | -3.002000000 | N | 9.515761000  | -4.615296000  | -2.844856000 |
| C | 1.536473000  | -16.424038000 | -3.933668000 | C | 9.506187000  | -3.310507000  | -3.247456000 |
| C | 2.460480000  | -15.376007000 | -3.847776000 | C | 8.671484000  | -5.751659000  | -3.289190000 |
| C | 2.339826000  | -14.411537000 | -2.823911000 | H | 12.899193000 | 5.850246000   | 5.780276000  |
| C | 1.285333000  | -14.504092000 | -1.893575000 | H | 11.442364000 | 4.867413000   | 6.095654000  |
| C | 0.368382000  | -15.568852000 | -1.987564000 | H | -3.297714000 | -20.761871000 | -8.207746000 |
| O | 3.313502000  | -13.406711000 | -2.823566000 | H | -1.661265000 | -20.616510000 | -8.907383000 |
| C | 3.244933000  | -12.366133000 | -1.772010000 | H | 9.876128000  | 7.869076000   | 3.136860000  |

|   |              |               |              |    |              |               |               |
|---|--------------|---------------|--------------|----|--------------|---------------|---------------|
| H | 9.790415000  | 7.209446000   | 0.739853000  | H  | 8.720468000  | -10.251121000 | -4.547943000  |
| H | 12.253428000 | 3.770275000   | 1.619187000  | C  | 7.962110000  | -9.732908000  | -5.118919000  |
| H | 12.353239000 | 4.420622000   | 3.979875000  | H  | 5.214822000  | -7.817918000  | -5.585583000  |
| H | -2.279404000 | -16.495371000 | -7.221281000 | C  | 6.096128000  | -8.439283000  | -5.671222000  |
| H | -1.344028000 | -16.005826000 | -4.968758000 | H  | 10.723981000 | -7.406747000  | -4.682868000  |
| H | -0.714293000 | -20.235308000 | -4.334433000 | C  | 8.891015000  | -6.094225000  | -4.737186000  |
| H | -1.617759000 | -20.721590000 | -6.556212000 | C  | 9.961613000  | -6.909182000  | -5.266779000  |
| H | 2.518148000  | -21.277273000 | -1.744862000 | Fe | 8.088423000  | -7.735260000  | -5.806762000  |
| H | 1.029731000  | -21.820959000 | 0.167607000  | C  | 7.846702000  | -9.705900000  | -6.554729000  |
| H | -1.079483000 | -20.498290000 | 0.541217000  | C  | 6.694404000  | -8.905324000  | -6.896378000  |
| H | 1.961145000  | -19.433244000 | -3.322167000 | C  | 8.103877000  | -5.618781000  | -5.853655000  |
| H | 1.638764000  | -17.149643000 | -4.735950000 | C  | 9.836577000  | -6.932964000  | -6.701907000  |
| H | 3.274262000  | -15.289476000 | -4.561524000 | H  | 8.516801000  | -10.185631000 | -7.254336000  |
| H | 1.161915000  | -13.771552000 | -1.103481000 | H  | 6.349599000  | -8.681990000  | -7.896266000  |
| H | -0.441906000 | -15.627522000 | -1.269056000 | C  | 8.687908000  | -6.136440000  | -7.064790000  |
| H | 2.304912000  | -11.811792000 | -1.877355000 | H  | 10.479453000 | -7.468902000  | -7.386077000  |
| H | 3.276856000  | -12.846392000 | -0.786685000 | H  | 8.320961000  | -5.970270000  | -8.067914000  |
| H | 3.884697000  | -9.823835000  | -3.390158000 | H  | 7.231159000  | -4.983361000  | -5.784635000  |
| H | 15.564462000 | 6.273656000   | -1.630171000 | H  | 8.944382000  | -6.581129000  | -2.631440000  |
| H | 14.711013000 | 7.848705000   | -3.350108000 | H  | 7.625459000  | -5.487650000  | -3.102978000  |
| H | 12.232554000 | 8.102298000   | -3.711122000 | C  | 6.584532000  | -8.755557000  | -3.104677000  |
| H | 14.002168000 | 4.919552000   | -0.240178000 | H  | 5.983998000  | -7.855202000  | -2.940952000  |
| H | 9.309932000  | 3.324158000   | 0.674581000  | H  | 7.502976000  | -8.674180000  | -2.517193000  |
| H | 8.938021000  | 0.917108000   | 0.175577000  | C  | -3.238680000 | -20.076392000 | -10.206990000 |
| H | 12.097396000 | 1.059114000   | -2.778627000 | C  | 11.669660000 | 6.554100000   | 7.349317000   |
| H | 12.451658000 | 3.432211000   | -2.293251000 | C  | -3.720311000 | -20.045928000 | -11.329813000 |
| H | 10.817864000 | -0.816649000  | -3.519389000 | C  | 11.552501000 | 7.080473000   | 8.446094000   |
| H | 12.045789000 | -1.216863000  | -2.279469000 | H  | -4.141596000 | -20.017166000 | -12.311232000 |
| H | 8.819484000  | -2.922909000  | -3.981293000 | H  | 11.448580000 | 7.541854000   | 9.404106000   |
| C | 6.878066000  | -8.950868000  | -4.567346000 |    |              |               |               |

.....

### *Ligand/Receptor 4*

**Electronic Energy:** -3519.532780 a.u.; **EE + Free Energy Correction:** -3518.682147 a.u.

.....

|   |             |               |             |   |              |               |             |
|---|-------------|---------------|-------------|---|--------------|---------------|-------------|
| C | 8.865360000 | -6.934177000  | 8.709249000 | O | 4.182768000  | -12.777621000 | 8.999989000 |
| C | 3.775666000 | -11.371205000 | 8.842008000 | C | 10.353864000 | -6.115059000  | 6.912241000 |
| O | 9.363515000 | -7.018496000  | 7.323387000 | C | 4.859725000  | -13.423032000 | 7.954436000 |

|   |              |               |              |   |              |               |              |
|---|--------------|---------------|--------------|---|--------------|---------------|--------------|
| C | 10.951225000 | -5.143748000  | 7.738947000  | C | 15.327957000 | -5.336192000  | 5.032281000  |
| C | 11.931524000 | -4.287452000  | 7.199869000  | C | 14.796604000 | -2.072753000  | 6.640653000  |
| C | 12.314008000 | -4.378903000  | 5.849166000  | O | 13.515426000 | -2.228904000  | 6.095034000  |
| C | 11.705783000 | -5.363950000  | 5.036739000  | C | 13.423715000 | -3.497092000  | 5.256867000  |
| C | 10.736644000 | -6.227361000  | 5.559941000  | O | 15.097793000 | -1.073365000  | 7.313373000  |
| C | 5.251288000  | -12.806141000 | 6.749492000  | C | 13.118304000 | -3.043059000  | 3.826514000  |
| C | 5.930061000  | -13.561970000 | 5.778145000  | C | 11.915956000 | -2.331269000  | 3.592400000  |
| C | 6.219800000  | -14.927128000 | 5.977765000  | C | 11.577592000 | -1.892416000  | 2.309521000  |
| C | 5.817659000  | -15.525522000 | 7.194569000  | C | 12.435626000 | -2.170397000  | 1.221269000  |
| C | 5.144033000  | -14.785816000 | 8.174686000  | C | 13.637104000 | -2.870900000  | 1.434877000  |
| C | 6.130435000  | -19.476695000 | 5.065854000  | C | 13.971511000 | -3.292578000  | 2.737761000  |
| C | 7.395523000  | -19.979322000 | 5.454637000  | O | 12.000303000 | -1.687073000  | -0.018070000 |
| C | 8.473435000  | -19.101773000 | 5.668212000  | C | 12.700970000 | -2.088442000  | -1.257700000 |
| C | 8.243937000  | -17.728426000 | 5.483082000  | C | 12.457920000 | -3.521094000  | -1.624407000 |
| C | 6.990963000  | -17.225086000 | 5.097619000  | N | 13.473330000 | -4.470065000  | -1.621488000 |
| C | 5.915063000  | -18.094926000 | 4.881843000  | N | 12.968372000 | -5.659840000  | -1.983758000 |
| C | 9.193217000  | -16.607921000 | 5.632185000  | N | 11.610237000 | -5.460916000  | -2.214449000 |
| O | 8.516079000  | -15.424547000 | 5.308002000  | C | 11.272512000 | -4.154144000  | -2.006747000 |
| C | 7.055792000  | -15.699970000 | 4.954410000  | C | 10.763682000 | -6.601258000  | -2.644483000 |
| O | 10.387293000 | -16.598961000 | 5.973476000  | H | 8.502573000  | -5.917517000  | 8.916227000  |
| C | 6.838678000  | -15.280869000 | 3.493237000  | H | 9.676224000  | -7.169131000  | 9.412625000  |
| C | 5.525019000  | -15.120558000 | 2.993043000  | H | 3.089756000  | -11.199613000 | 9.676318000  |
| C | 5.301836000  | -14.825921000 | 1.642183000  | H | 3.217547000  | -11.246810000 | 7.904499000  |
| C | 6.394877000  | -14.686423000 | 0.759908000  | H | 10.675495000 | -5.037360000  | 8.782789000  |
| C | 7.710080000  | -14.835954000 | 1.241967000  | H | 12.379848000 | -3.535807000  | 7.840882000  |
| C | 7.917663000  | -15.136994000 | 2.601774000  | H | 11.977642000 | -5.452000000  | 3.988932000  |
| O | 6.059158000  | -14.397928000 | -0.569417000 | H | 10.264362000 | -6.981407000  | 4.937763000  |
| C | 7.093393000  | -14.462630000 | -1.625930000 | H | 5.051587000  | -11.758001000 | 6.557379000  |
| C | 7.931449000  | -13.225005000 | -1.736747000 | H | 6.236674000  | -13.071149000 | 4.859513000  |
| N | 9.241335000  | -13.172392000 | -1.272969000 | H | 6.027265000  | -16.573063000 | 7.387362000  |
| N | 9.757252000  | -11.963114000 | -1.537223000 | H | 4.834089000  | -15.246015000 | 9.107857000  |
| N | 8.758021000  | -11.236233000 | -2.178076000 | H | 5.309386000  | -20.170119000 | 4.905381000  |
| C | 7.627712000  | -11.990135000 | -2.315777000 | H | 7.529783000  | -21.048950000 | 5.586678000  |
| C | 16.649678000 | -5.669964000  | 5.395381000  | H | 9.451811000  | -19.467539000 | 5.965541000  |
| C | 17.437571000 | -4.800582000  | 6.186683000  | H | 4.938334000  | -17.727433000 | 4.582692000  |
| C | 16.909790000 | -3.577692000  | 6.638022000  | H | 4.669685000  | -15.220464000 | 3.655619000  |
| C | 15.592782000 | -3.258480000  | 6.269211000  | H | 4.293378000  | -14.706767000 | 1.257416000  |
| C | 14.810254000 | -4.111496000  | 5.472694000  | H | 8.566157000  | -14.702411000 | 0.590162000  |

|   |              |               |              |    |              |               |              |
|---|--------------|---------------|--------------|----|--------------|---------------|--------------|
| H | 8.934595000  | -15.241660000 | 2.963577000  | C  | 11.108837000 | -6.865046000  | -5.235710000 |
| H | 7.732570000  | -15.337863000 | -1.464102000 | Fe | 9.274321000  | -7.921666000  | -5.221978000 |
| H | 6.508407000  | -14.611429000 | -2.536080000 | C  | 8.990747000  | -9.668190000  | -6.391960000 |
| H | 6.732833000  | -11.630007000 | -2.794976000 | C  | 7.712439000  | -9.075465000  | -6.075547000 |
| H | 17.070555000 | -6.614939000  | 5.062850000  | C  | 9.082924000  | -5.921490000  | -4.553071000 |
| H | 18.451774000 | -5.086212000  | 6.450125000  | C  | 10.349813000 | -6.536146000  | -6.415178000 |
| H | 17.493687000 | -2.902372000  | 7.256386000  | H  | 9.393785000  | -9.816328000  | -7.384025000 |
| H | 14.737031000 | -6.022362000  | 4.433645000  | H  | 6.990102000  | -8.703878000  | -6.788715000 |
| H | 11.243283000 | -2.123765000  | 4.419921000  | C  | 9.097339000  | -5.953930000  | -5.993476000 |
| H | 10.656956000 | -1.345685000  | 2.128527000  | H  | 10.656449000 | -6.712264000  | -7.436720000 |
| H | 14.306231000 | -3.106815000  | 0.615465000  | H  | 8.302882000  | -5.616019000  | -6.643995000 |
| H | 14.905404000 | -3.826142000  | 2.879755000  | H  | 8.284543000  | -5.541817000  | -3.929729000 |
| H | 12.281583000 | -1.410536000  | -2.004030000 | H  | 11.379437000 | -7.490269000  | -2.482515000 |
| H | 13.776048000 | -1.897113000  | -1.169388000 | H  | 9.899949000  | -6.647413000  | -1.973704000 |
| H | 10.271876000 | -3.775518000  | -2.131434000 | C  | 9.030677000  | -9.839141000  | -2.601102000 |
| C | 8.772115000  | -9.624214000  | -4.066512000 | H  | 8.408997000  | -9.171451000  | -1.994990000 |
| H | 10.618661000 | -10.467294000 | -5.050590000 | H  | 10.078743000 | -9.668002000  | -2.341821000 |
| C | 9.646819000  | -10.004086000 | -5.153971000 | C  | 4.897373000  | -10.424227000 | 8.898290000  |
| H | 6.730542000  | -8.668147000  | -4.085226000 | C  | 7.772513000  | -7.897504000  | 8.834152000  |
| C | 7.576717000  | -9.048430000  | -4.641549000 | C  | 5.817421000  | -9.610898000  | 8.918896000  |
| H | 12.092840000 | -7.313238000  | -5.212479000 | C  | 6.851247000  | -8.706540000  | 8.891602000  |
| C | 10.328593000 | -6.484305000  | -4.079727000 |    |              |               |              |

.....

*Complex [3·2Hg<sup>2+</sup>]*

**Electronic Energy: -3604.849652 a.u.; EE + Free Energy Correction: -3604.012116 a.u.**

.....

|   |              |               |              |   |              |               |              |
|---|--------------|---------------|--------------|---|--------------|---------------|--------------|
| C | 13.101785000 | 5.476790000   | 5.866466000  | C | -2.683362000 | -18.209224000 | -4.295049000 |
| C | -3.114054000 | -21.120483000 | -8.229379000 | C | -1.329818000 | -18.600569000 | -4.069835000 |
| O | 12.339080000 | 6.378993000   | 4.949447000  | C | -0.747717000 | -19.578180000 | -4.916414000 |
| O | -3.697107000 | -20.395441000 | -7.050797000 | C | -1.497866000 | -20.196960000 | -5.922513000 |
| C | 12.191563000 | 6.022716000   | 3.612105000  | C | 2.530081000  | -20.081090000 | -1.810314000 |
| C | -2.849066000 | -19.809834000 | -6.113371000 | C | 2.073848000  | -20.433825000 | -0.519679000 |
| C | 11.163667000 | 6.704245000   | 2.912692000  | C | 0.822256000  | -19.976256000 | -0.055010000 |
| C | 10.958396000 | 6.448363000   | 1.557746000  | C | 0.060094000  | -19.176327000 | -0.914963000 |
| C | 11.782713000 | 5.519844000   | 0.867051000  | C | 0.494340000  | -18.840089000 | -2.213002000 |
| C | 12.784449000 | 4.817436000   | 1.592069000  | C | 1.749800000  | -19.279421000 | -2.668829000 |
| C | 13.003234000 | 5.068365000   | 2.949668000  | C | -1.249764000 | -18.551440000 | -0.636816000 |
| C | -3.435098000 | -18.804763000 | -5.303566000 | O | -1.592216000 | -17.793293000 | -1.814967000 |

|   |              |               |              |   |              |               |              |
|---|--------------|---------------|--------------|---|--------------|---------------|--------------|
| C | -0.584972000 | -17.969848000 | -2.881750000 | C | 7.482024000  | -4.795333000  | -4.001673000 |
| O | -1.985617000 | -18.571570000 | 0.336926000  | H | 14.156858000 | 5.459312000   | 5.567781000  |
| C | -0.067871000 | -16.582368000 | -3.272238000 | H | 12.676515000 | 4.468418000   | 5.785475000  |
| C | 0.888679000  | -16.419283000 | -4.324916000 | H | -2.563331000 | -22.002569000 | -7.883299000 |
| C | 1.411854000  | -15.169759000 | -4.617597000 | H | -2.434311000 | -20.432101000 | -8.746216000 |
| C | 0.988576000  | -14.021121000 | -3.866872000 | H | 10.548431000 | 7.423341000   | 3.444851000  |
| C | -0.001670000 | -14.165756000 | -2.840737000 | H | 10.176531000 | 6.966629000   | 1.015790000  |
| C | -0.522642000 | -15.424291000 | -2.566815000 | H | 13.398628000 | 4.071063000   | 1.098247000  |
| O | 1.574169000  | -12.855966000 | -4.220036000 | H | 13.788451000 | 4.530287000   | 3.470145000  |
| C | 1.380185000  | -11.572184000 | -3.441061000 | H | -4.470255000 | -18.523590000 | -5.470368000 |
| C | 2.611474000  | -10.753583000 | -3.559481000 | H | -3.141518000 | -17.477029000 | -3.639757000 |
| N | 3.727946000  | -11.048759000 | -2.778227000 | H | 0.275392000  | -19.902158000 | -4.760217000 |
| N | 4.666832000  | -10.135562000 | -2.991896000 | H | -1.035868000 | -20.968865000 | -6.529318000 |
| N | 4.141794000  | -9.227127000  | -3.927555000 | H | 3.502623000  | -20.431161000 | -2.144172000 |
| C | 2.877421000  | -9.594665000  | -4.294009000 | H | 2.697178000  | -21.050805000 | 0.120537000  |
| C | 14.986163000 | 6.203761000   | -2.375371000 | H | 0.457721000  | -20.224471000 | 0.937579000  |
| C | 14.477707000 | 7.165756000   | -3.276749000 | H | 2.143179000  | -19.009472000 | -3.644384000 |
| C | 13.104312000 | 7.479955000   | -3.281185000 | H | 1.217601000  | -17.274633000 | -4.905893000 |
| C | 12.276374000 | 6.803488000   | -2.375314000 | H | 2.154806000  | -15.026313000 | -5.395251000 |
| C | 12.769208000 | 5.828725000   | -1.487021000 | H | -0.358525000 | -13.309006000 | -2.279992000 |
| C | 14.140150000 | 5.526975000   | -1.471599000 | H | -1.274543000 | -15.546543000 | -1.796131000 |
| C | 10.827050000 | 6.998198000   | -2.162432000 | H | 0.501067000  | -11.082541000 | -3.870625000 |
| O | 10.454493000 | 6.122567000   | -1.086077000 | H | 1.207917000  | -11.834716000 | -2.393447000 |
| C | 11.600624000 | 5.294839000   | -0.641731000 | H | 2.276646000  | -9.041139000  | -4.997564000 |
| O | 10.005865000 | 7.726535000   | -2.701430000 | H | 16.050330000 | 5.984894000   | -2.375834000 |
| C | 11.191805000 | 3.836910000   | -0.898239000 | H | 15.153061000 | 7.672019000   | -3.959928000 |
| C | 9.828607000  | 3.471464000   | -0.675287000 | H | 12.692228000 | 8.227586000   | -3.952660000 |
| C | 9.383703000  | 2.187478000   | -0.956265000 | H | 14.569888000 | 4.808979000   | -0.779059000 |
| C | 10.294082000 | 1.215061000   | -1.470977000 | H | 9.128409000  | 4.223828000   | -0.330171000 |
| C | 11.666439000 | 1.554973000   | -1.664257000 | H | 8.347081000  | 1.898866000   | -0.816854000 |
| C | 12.097972000 | 2.850377000   | -1.373818000 | H | 12.374486000 | 0.828815000   | -2.048452000 |
| O | 9.745948000  | -0.000455000  | -1.756834000 | H | 13.134628000 | 3.107244000   | -1.561903000 |
| C | 10.576068000 | -1.099701000  | -2.349204000 | H | 10.995301000 | -0.728897000  | -3.291887000 |
| C | 9.712881000  | -2.292077000  | -2.551816000 | H | 11.377198000 | -1.340648000  | -1.641744000 |
| N | 9.658197000  | -3.299207000  | -1.591198000 | H | 8.663344000  | -2.153147000  | -4.547574000 |
| N | 8.844709000  | -4.263632000  | -2.007520000 | C | 5.953647000  | -8.449239000  | -5.428057000 |
| N | 8.360428000  | -3.864766000  | -3.265623000 | H | 7.413240000  | -9.772103000  | -4.340142000 |
| C | 8.890033000  | -2.654014000  | -3.620353000 | C | 7.097187000  | -9.315106000  | -5.267856000 |

|    |              |               |              |    |              |               |               |
|----|--------------|---------------|--------------|----|--------------|---------------|---------------|
| H  | 5.117764000  | -7.441160000  | -7.266385000 | H  | 7.477380000  | -4.687786000  | -6.996885000  |
| C  | 5.869957000  | -8.078592000  | -6.820685000 | H  | 7.076175000  | -5.462615000  | -3.235244000  |
| H  | 9.587229000  | -6.887470000  | -3.839750000 | H  | 6.655952000  | -4.227150000  | -4.442472000  |
| C  | 8.242771000  | -5.556709000  | -5.061862000 | C  | 4.982348000  | -8.077216000  | -4.334773000  |
| C  | 9.269510000  | -6.541137000  | -4.813980000 | H  | 4.316627000  | -7.268299000  | -4.651861000  |
| Fe | 7.766119000  | -7.431722000  | -6.060086000 | H  | 5.505614000  | -7.760528000  | -3.427282000  |
| C  | 7.702233000  | -9.497718000  | -6.560856000 | C  | -4.217348000 | -21.503713000 | -9.108449000  |
| C  | 6.946057000  | -8.732011000  | -7.522100000 | C  | 12.952232000 | 5.983237000   | 7.229082000   |
| C  | 8.150683000  | -5.365692000  | -6.488898000 | C  | -5.060147000 | -21.840381000 | -9.932839000  |
| C  | 9.829708000  | -6.931492000  | -6.081633000 | C  | 12.857502000 | 6.317100000   | 8.403255000   |
| H  | 8.574216000  | -10.100085000 | -6.773309000 | H  | -5.782200000 | -22.130749000 | -10.670449000 |
| H  | 7.148922000  | -8.661935000  | -8.581454000 | H  | 12.773042000 | 6.589547000   | 9.435591000   |
| C  | 9.135711000  | -6.208135000  | -7.119361000 | Hg | -6.182870000 | -21.759693000 | -6.830921000  |
| H  | 10.628909000 | -7.644060000  | -6.229550000 | Hg | 12.749737000 | 8.972730000   | 6.279221000   |
| H  | 9.324088000  | -6.280385000  | -8.181255000 |    |              |               |               |

.....  
*Complex [4·Hg<sup>2+</sup>] (left side)*

**Electronic Energy:** -3562.039179 a.u.; **EE + Free Energy Correction:** -3561.192992 a.u.

|   |              |               |             |   |              |               |              |
|---|--------------|---------------|-------------|---|--------------|---------------|--------------|
| C | 8.788299000  | -6.947029000  | 8.661317000 | C | 8.590952000  | -19.031723000 | 5.715043000  |
| C | 3.684837000  | -11.370941000 | 8.729519000 | C | 8.332450000  | -17.666329000 | 5.510291000  |
| O | 9.287013000  | -7.030078000  | 7.276768000 | C | 7.074810000  | -17.197312000 | 5.097633000  |
| O | 4.105042000  | -12.770057000 | 8.904534000 | C | 6.023752000  | -18.094744000 | 4.872923000  |
| C | 10.280545000 | -6.127228000  | 6.868913000 | C | 9.252685000  | -16.522221000 | 5.661362000  |
| C | 4.815302000  | -13.412200000 | 7.877448000 | O | 8.553789000  | -15.358960000 | 5.309973000  |
| C | 10.877656000 | -5.159001000  | 7.699088000 | C | 7.106391000  | -15.672974000 | 4.937794000  |
| C | 11.859337000 | -4.302198000  | 7.163463000 | O | 10.439925000 | -16.480412000 | 6.023085000  |
| C | 12.243646000 | -4.390654000  | 5.813078000 | C | 6.900306000  | -15.274704000 | 3.469348000  |
| C | 11.636271000 | -5.373667000  | 4.997631000 | C | 5.590487000  | -15.141747000 | 2.951543000  |
| C | 10.665296000 | -6.237382000  | 5.517248000 | C | 5.379151000  | -14.867046000 | 1.594558000  |
| C | 5.227291000  | -12.795179000 | 6.679596000 | C | 6.480505000  | -14.720842000 | 0.723750000  |
| C | 5.936801000  | -13.547086000 | 5.727396000 | C | 7.792012000  | -14.844170000 | 1.223310000  |
| C | 6.238235000  | -14.907712000 | 5.940157000 | C | 7.987732000  | -15.125202000 | 2.589071000  |
| C | 5.815831000  | -15.505723000 | 7.150016000 | O | 6.156422000  | -14.453054000 | -0.612573000 |
| C | 5.110503000  | -14.770012000 | 8.110956000 | C | 7.203906000  | -14.514026000 | -1.656473000 |
| C | 6.268421000  | -19.468930000 | 5.076333000 | C | 8.026417000  | -13.266290000 | -1.769864000 |
| C | 7.537937000  | -19.936924000 | 5.492870000 | N | 9.329497000  | -13.191338000 | -1.290247000 |

|   |              |               |              |    |              |               |              |
|---|--------------|---------------|--------------|----|--------------|---------------|--------------|
| N | 9.832358000  | -11.977834000 | -1.560020000 | H  | 4.784264000  | -15.230230000 | 9.038529000  |
| N | 8.831671000  | -11.270926000 | -2.220596000 | H  | 5.467124000  | -20.183528000 | 4.909094000  |
| C | 7.713429000  | -12.041362000 | -2.364937000 | H  | 7.695226000  | -21.001537000 | 5.639149000  |
| C | 16.583061000 | -5.675444000  | 5.373386000  | H  | 9.572380000  | -19.371017000 | 6.032944000  |
| C | 17.366483000 | -4.806086000  | 6.169123000  | H  | 5.044301000  | -17.753835000 | 4.551996000  |
| C | 16.835076000 | -3.584711000  | 6.620328000  | H  | 4.728940000  | -15.248090000 | 3.605033000  |
| C | 15.518989000 | -3.266979000  | 6.246972000  | H  | 4.373735000  | -14.768964000 | 1.196121000  |
| C | 14.740921000 | -4.120038000  | 5.446124000  | H  | 8.653730000  | -14.705654000 | 0.580046000  |
| C | 15.262211000 | -5.343163000  | 5.005681000  | H  | 9.001801000  | -15.209731000 | 2.964055000  |
| C | 14.719713000 | -2.082864000  | 6.616802000  | H  | 7.852787000  | -15.378856000 | -1.478278000 |
| O | 13.440975000 | -2.239830000  | 6.065249000  | H  | 6.631568000  | -14.679850000 | -2.571681000 |
| C | 13.354506000 | -3.507149000  | 5.225201000  | H  | 6.820028000  | -11.698061000 | -2.859012000 |
| O | 15.016269000 | -1.084302000  | 7.292694000  | H  | 17.006865000 | -6.619058000  | 5.040733000  |
| C | 13.054512000 | -3.052387000  | 3.794044000  | H  | 18.380190000 | -5.090416000  | 6.435821000  |
| C | 11.850422000 | -2.345451000  | 3.554140000  | H  | 17.415676000 | -2.909337000  | 7.241722000  |
| C | 11.517577000 | -1.905819000  | 2.270069000  | H  | 14.674902000 | -6.029007000  | 4.403107000  |
| C | 12.383272000 | -2.177831000  | 1.186330000  | H  | 11.172096000 | -2.142095000  | 4.378095000  |
| C | 13.586919000 | -2.872813000  | 1.405948000  | H  | 10.595624000 | -1.362809000  | 2.084627000  |
| C | 13.915468000 | -3.295508000  | 2.709901000  | H  | 14.262016000 | -3.103928000  | 0.590123000  |
| O | 11.952751000 | -1.695135000  | -0.054734000 | H  | 14.851079000 | -3.824811000  | 2.856392000  |
| C | 12.664096000 | -2.089560000  | -1.290814000 | H  | 12.243842000 | -1.414116000  | -2.038835000 |
| C | 12.434651000 | -3.523687000  | -1.660270000 | H  | 13.737003000 | -1.889722000  | -1.195438000 |
| N | 13.456315000 | -4.465877000  | -1.645597000 | H  | 10.256002000 | -3.793050000  | -2.190695000 |
| N | 12.963194000 | -5.659291000  | -2.011743000 | C  | 8.834941000  | -9.667699000  | -4.117620000 |
| N | 11.606257000 | -5.469731000  | -2.257245000 | H  | 10.699768000 | -10.483266000 | -5.090386000 |
| C | 11.257663000 | -4.165001000  | -2.054665000 | C  | 9.721089000  | -10.036116000 | -5.199745000 |
| C | 10.772022000 | -6.617432000  | -2.691701000 | H  | 6.778312000  | -8.744517000  | -4.149078000 |
| H | 8.432396000  | -5.928777000  | 8.872691000  | C  | 7.633359000  | -9.112434000  | -4.700140000 |
| H | 9.595505000  | -7.191431000  | 9.365712000  | H  | 12.124422000 | -7.309274000  | -5.253014000 |
| H | 2.968528000  | -11.206970000 | 9.539057000  | C  | 10.342770000 | -6.505806000  | -4.129033000 |
| H | 3.157365000  | -11.254002000 | 7.773426000  | C  | 11.133935000 | -6.875889000  | -5.281088000 |
| H | 10.601250000 | -5.055104000  | 8.743013000  | Fe | 9.315723000  | -7.960009000  | -5.274123000 |
| H | 12.307256000 | -3.552499000  | 7.806983000  | C  | 9.066071000  | -9.713529000  | -6.441810000 |
| H | 11.910124000 | -5.459869000  | 3.950236000  | C  | 7.776815000  | -9.140729000  | -6.133338000 |
| H | 10.193558000 | -6.989637000  | 4.892507000  | C  | 9.090999000  | -5.962067000  | -4.608581000 |
| H | 5.019950000  | -11.750292000 | 6.477589000  | C  | 10.375463000 | -6.559423000  | -6.464266000 |
| H | 6.258267000  | -13.057110000 | 4.813391000  | H  | 9.476485000  | -9.857440000  | -7.431464000 |
| H | 6.033564000  | -16.549744000 | 7.352322000  | H  | 7.052258000  | -8.782593000  | -6.851119000 |

|   |              |              |              |    |              |               |              |
|---|--------------|--------------|--------------|----|--------------|---------------|--------------|
| C | 9.112497000  | -5.995725000 | -6.048868000 | H  | 8.458668000  | -9.209489000  | -2.049836000 |
| H | 10.689379000 | -6.731790000 | -7.484229000 | H  | 10.135209000 | -9.689007000  | -2.387847000 |
| H | 8.316164000  | -5.670200000 | -6.703396000 | C  | 4.794541000  | -10.410560000 | 8.819234000  |
| H | 8.284150000  | -5.593766000 | -3.989329000 | C  | 7.687291000  | -7.902487000  | 8.780682000  |
| H | 11.395201000 | -7.500599000 | -2.526258000 | C  | 5.719220000  | -9.601508000  | 8.852305000  |
| H | 9.905276000  | -6.671478000 | -2.025353000 | C  | 6.759623000  | -8.704358000  | 8.832686000  |
| C | 9.090119000  | -9.873117000 | -2.650338000 | Hg | 3.648622000  | -8.146312000  | 11.507892000 |

**Complex [4·Hg<sup>2+</sup>] (right side)**

**Electronic Energy: -3562.039334 a.u.; EE + Free Energy Correction: -3561.194498 a.u.**

|   |              |               |             |   |              |               |              |
|---|--------------|---------------|-------------|---|--------------|---------------|--------------|
| C | 8.709781000  | -6.845185000  | 8.683286000 | C | 5.395711000  | -14.862730000 | 1.595340000  |
| C | 3.680365000  | -11.351822000 | 8.711536000 | C | 6.494727000  | -14.716901000 | 0.721558000  |
| O | 9.211530000  | -6.952444000  | 7.301665000 | C | 7.807704000  | -14.833956000 | 1.218818000  |
| O | 4.112683000  | -12.746439000 | 8.893652000 | C | 8.007201000  | -15.107517000 | 2.585540000  |
| C | 10.221908000 | -6.071682000  | 6.886115000 | O | 6.166892000  | -14.455877000 | -0.615224000 |
| C | 4.827598000  | -13.387688000 | 7.869798000 | C | 7.212488000  | -14.516364000 | -1.660874000 |
| C | 10.832936000 | -5.103896000  | 7.706348000 | C | 8.032995000  | -13.267511000 | -1.777282000 |
| C | 11.833551000 | -4.273114000  | 7.164432000 | N | 9.339005000  | -13.192768000 | -1.305704000 |
| C | 12.222321000 | -4.386993000  | 5.817389000 | N | 9.839415000  | -11.978375000 | -1.575977000 |
| C | 11.598749000 | -5.367648000  | 5.011275000 | N | 8.834183000  | -11.270698000 | -2.228720000 |
| C | 10.609316000 | -6.205934000  | 5.537373000 | C | 7.715517000  | -12.041527000 | -2.367797000 |
| C | 5.237329000  | -12.772468000 | 6.670153000 | C | 16.519993000 | -5.794775000  | 5.367180000  |
| C | 5.951919000  | -13.523589000 | 5.721156000 | C | 17.330012000 | -4.946493000  | 6.159083000  |
| C | 6.260838000  | -14.881813000 | 5.938769000 | C | 16.835109000 | -3.709360000  | 6.608868000  |
| C | 5.841177000  | -15.477917000 | 7.150545000 | C | 15.527678000 | -3.354786000  | 6.238148000  |
| C | 5.130831000  | -14.742952000 | 8.108302000 | C | 14.723566000 | -4.187045000  | 5.441261000  |
| C | 6.319633000  | -19.446381000 | 5.096016000 | C | 15.208298000 | -5.425530000  | 5.002062000  |
| C | 7.592591000  | -19.904227000 | 5.513361000 | C | 14.763428000 | -2.147441000  | 6.606982000  |
| C | 8.639999000  | -18.991255000 | 5.730165000 | O | 13.479320000 | -2.268892000  | 6.058477000  |
| C | 8.372511000  | -17.628515000 | 5.519312000 | C | 13.354447000 | -3.535680000  | 5.222795000  |
| C | 7.111421000  | -17.169587000 | 5.105857000 | O | 15.089767000 | -1.156268000  | 7.279965000  |
| C | 6.065900000  | -18.074770000 | 4.886477000 | C | 13.062620000 | -3.078346000  | 3.790914000  |
| C | 9.285501000  | -16.477753000 | 5.663805000 | C | 11.868361000 | -2.356002000  | 3.547885000  |
| O | 8.578892000  | -15.320793000 | 5.307507000 | C | 11.544759000 | -1.911593000  | 2.263128000  |
| C | 7.132743000  | -15.645901000 | 4.938951000 | C | 12.410132000 | -2.193891000  | 1.181772000  |
| O | 10.472912000 | -16.426668000 | 6.023996000 | C | 13.604632000 | -2.903630000  | 1.404586000  |
| C | 6.922138000  | -15.255939000 | 3.468923000 | C | 13.923988000 | -3.331197000  | 2.709194000  |
| C | 5.610803000  | -15.130217000 | 2.953184000 | O | 11.988666000 | -1.706061000  | -0.060265000 |



|   |              |               |              |    |              |               |              |
|---|--------------|---------------|--------------|----|--------------|---------------|--------------|
| C | 12.699879000 | -2.106673000  | -1.294421000 | H  | 11.190010000 | -2.144619000  | 4.369832000  |
| C | 12.459236000 | -3.538757000  | -1.664750000 | H  | 10.630145000 | -1.357140000  | 2.075272000  |
| N | 13.473954000 | -4.488386000  | -1.650719000 | H  | 14.279203000 | -3.142571000  | 0.590578000  |
| N | 12.972112000 | -5.677916000  | -2.017639000 | H  | 14.852402000 | -3.872412000  | 2.858167000  |
| N | 11.616602000 | -5.478258000  | -2.262899000 | H  | 12.287621000 | -1.427428000  | -2.043453000 |
| C | 11.277513000 | -4.171175000  | -2.059435000 | H  | 13.774241000 | -1.916283000  | -1.195975000 |
| C | 10.773858000 | -6.619969000  | -2.696607000 | H  | 10.278512000 | -3.791989000  | -2.195066000 |
| H | 8.351097000  | -5.823855000  | 8.874108000  | C  | 8.824199000  | -9.661520000  | -4.120986000 |
| H | 9.515854000  | -7.074380000  | 9.394192000  | H  | 10.678972000 | -10.481238000 | -5.109440000 |
| H | 2.963186000  | -11.188506000 | 9.520906000  | C  | 9.701255000  | -10.030041000 | -5.210464000 |
| H | 3.151745000  | -11.244138000 | 7.755095000  | H  | 6.770958000  | -8.730478000  | -4.135060000 |
| H | 10.553269000 | -4.980733000  | 8.747329000  | C  | 7.620678000  | -9.099933000  | -4.693286000 |
| H | 12.293650000 | -3.523891000  | 7.799839000  | H  | 12.114875000 | -7.313448000  | -5.263683000 |
| H | 11.874684000 | -5.471618000  | 3.965968000  | C  | 10.340582000 | -6.503913000  | -4.132366000 |
| H | 10.125822000 | -6.956928000  | 4.920178000  | C  | 11.126161000 | -6.875790000  | -5.287676000 |
| H | 5.023861000  | -11.729545000 | 6.464473000  | Fe | 9.303495000  | -7.952291000  | -5.275863000 |
| H | 6.271134000  | -13.034998000 | 4.805600000  | C  | 9.038650000  | -9.701274000  | -6.446883000 |
| H | 6.064668000  | -16.519978000 | 7.356652000  | C  | 7.753858000  | -9.124417000  | -6.127541000 |
| H | 4.806329000  | -15.201740000 | 9.037189000  | C  | 9.089447000  | -5.954299000  | -4.606826000 |
| H | 5.522780000  | -20.166911000 | 4.933030000  | C  | 10.364897000 | -6.554522000  | -6.467776000 |
| H | 7.756890000  | -20.967111000 | 5.664462000  | H  | 9.441466000  | -9.843816000  | -7.439851000 |
| H | 9.623908000  | -19.322781000 | 6.048593000  | H  | 7.025576000  | -8.761411000  | -6.839077000 |
| H | 5.083941000  | -17.741572000 | 4.565083000  | C  | 9.105752000  | -5.986112000  | -6.047220000 |
| H | 4.751059000  | -15.236506000 | 3.609026000  | H  | 10.674502000 | -6.726848000  | -7.489063000 |
| H | 4.389137000  | -14.769859000 | 1.198588000  | H  | 8.308495000  | -5.656389000  | -6.698512000 |
| H | 8.667654000  | -14.696295000 | 0.573017000  | H  | 8.286342000  | -5.583463000  | -3.984230000 |
| H | 9.022366000  | -15.186917000 | 2.958702000  | H  | 11.392165000 | -7.507114000  | -2.534272000 |
| H | 7.863342000  | -15.379772000 | -1.482848000 | H  | 9.908808000  | -6.669681000  | -2.027698000 |
| H | 6.638672000  | -14.684412000 | -2.574751000 | C  | 9.089218000  | -9.871606000  | -2.656110000 |
| H | 6.818797000  | -11.697567000 | -2.855372000 | H  | 8.461660000  | -9.209878000  | -2.049459000 |
| H | 16.915770000 | -6.750821000  | 5.035495000  | H  | 10.135980000 | -9.688115000  | -2.399935000 |
| H | 18.335833000 | -5.259195000  | 6.423866000  | C  | 4.779884000  | -10.380708000 | 8.799074000  |
| H | 17.436621000 | -3.049653000  | 7.227177000  |    |              |               |              |
| H | 14.599876000 | -6.095319000  | 4.402307000  |    |              |               |              |

\*\*\*\*\*
